# Supplementary material for: A Parabrachial-Hypothalamic Cholecystokinin Neurocircuit Controls Counterregulatory Responses to Hypoglycemia
Source: PubMed Central journal article supplement (PMC4261079; doi:10.1016/j.cmet.2014.11.006), 2014-12-02

Cell Metabolism, Volume 20

## Supplemental Information

### A Parabrachial-Hypothalamic Cholecystokinin Neurocircuit

#### Controls Counterregulatory Responses to Hypoglycemia

Alastair S. Garfield, Bhavik P. Shah, Joseph C. Madara, Luke K. Burke,  
Christa M. Patterson, Jonathan Flak, Rachael L. Neve, Mark L. Evans,  
Bradford B. Lowell, Martin G. Myers Jr., and Lora K. Heisler

**1 SUPPLEMENTAL FIGURE LEGENDS**

2

**3 Figure S1, related to Figure 1.**

4 Comparative distribution profile of 2-deoxyglucose and insulin cFOS-IR (red) across the  
5 rostral-caudal extent of the LPBN (-5.02 to -5.52 mm from Bregma) compared to saline.  
6 Abbreviations: 2DG, 2-deoxyglucose; INS, insulin; SAL, saline; scp, superior cerebellar  
7 peduncle; S, superior LPBN; e, external LPBN; c, central LPBN; d, dorsal LPBN; v,  
8 ventral LPBN.

9

**10 Figure S2, related to Figure 2.**

11 (A-B) *CCK-ires-Cre::hM3D<sub>q</sub>-mCherry*<sup>LPBN</sup> neurons (red) exhibited robust cFOS-IR (green)  
12 in response to systemic CNO administration (1 mg/kg, i.p.) compared to saline controls.  
13 (C) The DREADD-receptor ligand, CNO, has no effect on blood glucose concentration in  
14 *CCK-ires-Cre* mice in the absence of Cre-dependent DREADD-receptor expression  
15 (n=6, Repeated measures ANOVA, main effect of treatments, time and interaction not  
16 significant). (D) Serum insulin levels were not significantly affected by CNO  
17 administration in *CCK-ires-Cre::hM3D<sub>q</sub>-mCherry*<sup>LPBN</sup> mice (n=5-8, t-test,  $t_{(11)}=1.4$ , p=0.2),  
18 compared to saline controls (E) *CCK-ires-Cre::hM3D<sub>q</sub>-mCherry*<sup>LPBN</sup> mice do not exhibit a  
19 difference in 3 hour food intake following an overnight fast (n=10, t-test,  $t_{(9)}=1.4$ , p=0.2).  
20 All data are presented as mean±SEM.

21

**22 Figure S3, related to Figure 3.**

23 (A-C) *CCK-ires-Cre::hM4D<sub>I</sub>-mCherry*<sup>LPBN</sup> mice do not exhibit altered feeding behavior in  
24 response to CNO administration compared to saline administration. (A) 3 hour dark-cycle  
25 food intake in *ad libitum* fed mice (n=7, paired t-test,  $t_{(6)}=0.4$ , p=0.7). (B) 3 hour light cycle  
26 food intake in *ad libitum* fed mice (n=11; paired t-test,  $t_{(11)}=0.4$ , p=0.7). (C) 3 hour food  
27 intake in mice following an overnight fast (n=7; paired t-test,  $t_{(6)}=0.08$ , p=0.9). All data are  
28 presented as mean±SEM.

29

**30 Figure S4, related to Figure 4.**

31 (A-F) Unilateral stereotaxic injection of Cre-dependent AAV-synpatophysin-mCherry  
32 virus into the LPBN of *CCK-ires-Cre* mice facilitated genetically-defined tract tracing of  
33 CCK<sup>LPBN</sup> neuron projections. Only ascending projections were observed, principally  
34 terminating within the ipsilateral hypothalamus. (G) CCK-8S application to SF1<sup>VMH</sup>

1 neurons incubated in normal glucose conditions (5 mM) resulted in an increase in firing  
2 frequency (5/9) (paired t-test,  $t_{(4)}=3.24$ ,  $p<0.05$ ). (J-K) Non-SF1<sup>VMH</sup> neurons are  
3 unresponsive to CCK in *ex vivo* slice preparations. (H) Non-SF1<sup>VMH</sup> neurons (10/10) did  
4 not exhibit a change in firing frequency over baseline upon CCK administration (paired t-  
5 test,  $t_{(9)}=0.1$ ,  $p=0.9$ ). (I) Representative electrophysiological trace of a CCK insensitive  
6 non-SF1<sup>VMH</sup> neuron. (J) Cre-dependent AAV-synaptophysin-mCherry virus injections into  
7 the LPBN of *vGLUT2-ires-Cre* mice revealed no VMH projection. (K) Chemogenetic  
8 activation of *vGLUT2-ires-Cre::hM3Dq*<sup>LPBN</sup> neurons failed to elevate blood glucose levels  
9 ( $n=4$ , Repeated measures ANOVA, main effect of treatments, time and interaction not  
10 significant). (L) Chemogenetic inhibition of *SF1-Cre::hM4Di*<sup>VMH</sup> neurons resulted in a  
11 significant attenuation of the hyperglycemic response to 2DG ( $n=4$ ; Repeated measures  
12 ANOVA, main effect of treatment ( $F_{(1,21)}=43.6$ ,  $p<0.0004$ ), main effect of time  
13 ( $F_{(6,21)}=10.7$ ,  $p<0.0001$ ) and interaction ( $F_{(6,21)}=3.5$ ,  $p=0.01$ ), *post-hoc* comparisons  
14 determined by Sidak's *post-hoc* test for individual time point analysis). (M-O) CCK<sup>DMH</sup>  
15 neurons are not engaged by CCK<sup>LPBN</sup> neurons. (M) CNO mediated activation of *CCK-*  
16 *ires-Cre::hM3Dq-mCherry*<sup>LPBN</sup> neurons does not evoke cFOS-IR (magenta) within  
17 CCK<sup>DMH</sup> neurons (green) in *CCK-ires-Cre::R26-loxSTOPlox-L10-GFP* mice. (N)  
18 CCK<sup>DMH</sup> neurons are not responsive to exogenous CCK-8S (0/4 cells). (O)  
19 chemogenetic silencing of CCK<sup>DMH</sup> neurons does not influence blood glucose levels  
20 ( $n=4$ , Repeated measures ANOVA, main effect of treatments, time and interaction not  
21 significant). Abbreviations: ARC, arcuate nucleus of the hypothalamus; AHC, anterior  
22 hypothalamic area, central part; BST, bed nucleus of the stria terminalis; DMH,  
23 dorsomedial nucleus of the hypothalamus; cDMH, DMH, compact part; LHA, lateral  
24 hypothalamic area; LPBN, lateral parabrachial nucleus; MnPO, median preoptic nucleus;  
25 MPA, median preoptic area; MeP, medial amygdaloid nucleus; PAG, periaqueductal  
26 gray; PVT, paraventricular nucleus of the thalamus; PVH, paraventricular nucleus of the  
27 hypothalamus; PP, peripeduncular nucleus; SCh, suprachiasmatic nucleus; SnC,  
28 substantia nigra pars compacta; VMH, ventromedial nucleus of the hypothalamus. All  
29 data are presented as mean±SEM; \* $p<0.05$ , \*\* $p<0.01$ , \*\*\* $p<0.001$ .

30  
31  
32  
33  
34

## 1 SUPPLEMENTAL EXPERIMENTAL PROCEDURES

2

### 3 **Animals**

4 Mice were housed at 22°C–24°C with a 12-hour light/12-hour dark cycle and standard  
5 mouse chow (Teklad F6 Rodent Diet 8664) and water provided *ad libitum*. Animal care  
6 and experimental procedures were performed with approval by the Beth Israel  
7 Deaconess Medical Center Institutional Animal Care and Use Committee or were  
8 performed in accordance with the UK Animals (Scientific Procedures) Act 1986.

9

### 10 **Drugs**

11 Drugs for *in vivo* use were prepared in sterile saline and administered intraperitoneally  
12 (i.p.). Clozapine-*N*-oxide (CNO; a generous gift from Dr Bryan Roth, University of North  
13 Carolina) was administered at 1 mg/kg, humalin R (Eli Lilly) was administered at 1 U/kg,  
14 2-Deoxyglucose (2DG, Sigma Aldrich) was administered at 500 mg/kg, proglumide  
15 (Tocris Bioscience) was administered at 20 mg/kg. CI988 (Tocris Bioscience) was  
16 dissolved in 50% DMSO and administered at 1 mg/kg.

17

### 18 **Stereotaxic surgery**

19 Nucleus specific delivery of AAVs was achieved through stereotaxic injection, as  
20 previously described (Krashes et al., 2011). In brief, 5-8 week old male mice were  
21 anesthetized with 100 mg/kg ketamine and 10 mg/kg xylazine (i.p). Mice were placed in  
22 a stereotaxic frame (Kopf Instruments) and the skull exposed by a single longitudinal  
23 incision. A hole was drilled in the skull at the injection site and a virus filled pulled-glass  
24 micropipette (diameter 20-40  $\mu$ m) inserted into the brain. Virus was delivered under air  
25 pressure using a micromanipulator (Grass Technologies). For LPBN injections 25 nl and  
26 for VMH 50 nl of virus was delivered. The pipette remained in place for a minimum of 5  
27 minutes after injection. Based on the Mouse Brain Atlas (Franklin and Paxinos, 2008) the  
28 following coordinates used for targeting (mm from Bregma): LPBN, A/P, -5.02; M/V,  $\pm$ 1.3;  
29 D/V, -3.4 mm. VMH, A/P, -1.57; M/V,  $\pm$  0.3; D/V, -5.60 mm. Animals were administered  
30 an analgesic (5 mg/kg Meloxicam, Norbrook) for 3 days post-operatively and given a  
31 minimum of 14 days recovery before being used in any experiments, during this time  
32 they were also acclimated to i.p injection by once daily injections of 0.3 ml sterile saline.  
33 Mice injected with AAV8-hSyn-DIO-Synaptophysin-mCherry were tested at least 3  
34 weeks after treatment to ensure labelling of distal projection sites.

## 1 **Brain tissue preparation**

2 Mice were terminally anesthetized with chloral hydrate (Sigma Aldrich) and transcardially  
3 perfused with phosphate-buffered saline (PBS) followed by 10% neutral buffered  
4 formalin (Fisher Scientific). Brains were extracted, cryoprotected in 20% sucrose, and  
5 sectioned coronally on a freezing sliding microtome (Leica Biosystems) at 30  $\mu$ m and  
6 collected in four equal series.

7

## 8 **Immunohistochemistry**

9 Briefly, sections were washed in PBS before blocking in 0.5% BSA/0.25% Triton X-100  
10 in PBS for 1 hour at room temperature. Tissue was incubated overnight at room  
11 temperature in blocking buffer containing the primary antibodies (diluted 1/1000): rabbit  
12 anti-cFOS (EMD Millipore), rabbit anti-RFP (Clontech Laboratories, Inc.) or chicken anti-  
13 GFP (EMD Millipore). The next day sections were washed in PBS then incubated in  
14 blocking buffer containing appropriate secondary antibody (1/1000, Alexa Fluor; Life  
15 Technologies) for 1 hour. Sections were mounted onto microscope slides and  
16 coverslipped in an aqueous mounting medium containing DAPI (Vectastain; Vector  
17 Laboratories). Slides were imaged on a VS120 slide scanner (Olympus). For counting of  
18 cFOS-IR nuclei, the boundaries of the nucleus were defined using neuroanatomical  
19 landmarks and the Mouse Brain Atlas (Franklin and Paxinos, 2008). All sections within  
20 one series containing the nucleus of interest were counted bilaterally and an average  
21 determined from each section. For CCK co-localisation the total number of CCK<sup>LPBN</sup>  
22 neurons and number of cFOS-IR+CCK<sup>LPBN</sup> neurons in one series were counted.

23

## 24 **Blood chemistry analysis**

25 Insulin and glucagon levels were determined from serum samples recovered 60 minutes  
26 after SAL or CNO administration by means of a multiplex ELISA (EMD Millipore).  
27 Catecholamine levels were determined from plasma samples recovered 60 minutes after  
28 SAL or CNO administration by HPLC via electrochemical detection. Specifically, trunk  
29 blood was collected in tubes containing 236 mM EGTA (Sigma Aldrich) and 195 mM  
30 glutathione (Sigma Aldrich) following decapitated. Samples were centrifuged for 15  
31 minutes at 1,500g at 4°C and the resulting plasma transferred to a new tube. Plasma  
32 was absorbed onto alumina at a pH 8.6, eluted with dilute perchloric acid and auto-  
33 injected onto a C18 reversed-phase column. An internal standard  
34 (dehydroxybenzylamine; DHBA) was included with each extraction to monitor recovery

1 and standard curves for both epinephrine and norepinephrine were run. Results are  
2 quantitated through a chromatography data station.

3

#### 4 **RNA extraction and quantitative-PCR**

5 Total RNA was extracted from 100 mg of liver using PureLink RNA mini kit (Life  
6 Technologies), as per the manufacture's instructions. Multiplex qPCR analysis of  
7 glucose-6-phosphatase (*G6pc*) and 18S ribosomal RNA (18S) expression was  
8 conducted using pre-designed Taqman assays and Taqman One-Step RT-PCR Master  
9 Mix (Applied Biosystems), as per the manufacture's instructions. qPCR was run on a  
10 Applied Biosystems Prism 7000 Sequence Detection System. Reactions were  
11 multiplexed for G6pc/18S. Data were analyzed using the 2- $\Delta\Delta$ CT method.

12

#### 13 **Feeding studies**

14 *Dark-cycle food intake.* Mice were injected with saline or 1 mg/kg CNO 30 minutes prior  
15 to the onset of the dark cycle and food removed. Food was returned at lights-off and  
16 weighed every hour over the next three hours. *Post-fast reefered.* Mice were fasted  
17 overnight. The following morning, mice were injected with saline or 1 mg/kg CNO and  
18 food returned 30 minutes later and weighed every hour for the next three hours. *Light-*  
19 *cycle food intake.* Mice were injected with saline or 1 mg/kg CNO at 9am and food intake  
20 monitored over the next three hours.

21

#### 22 **Electrophysiology**

23 For brain slice preparation, 5-12 week old mice were terminally anesthetized with 7%  
24 chloral hydrate (i.p) and transcardially perfused with ice-cold artificial cerebral spinal fluid  
25 (aCSF). The mice were decapitated and brains were removed. Brains were immediately  
26 submerged in ice-cold, carbogen-saturated (95% O<sub>2</sub>, 5% CO<sub>2</sub>) high sucrose solution  
27 (238 mM sucrose, 26 mM NaHCO<sub>3</sub>, 2.5 mM KCl, 1.0 mM NaH<sub>2</sub>PO<sub>4</sub>, 5.0 mM MgCl<sub>2</sub>, 10.0  
28 mM CaCl<sub>2</sub>, 10 mM glucose). 300  $\mu$ M thick coronal sections were cut with a Leica  
29 VT1000S vibratome and incubated in oxygenated aCSF (126 mM NaCl, 21.4 mM  
30 NaHCO<sub>3</sub>, 2.5 mM KCl, 1.2 mM NaH<sub>2</sub>PO<sub>4</sub>, 1.2 mM MgCl<sub>2</sub>, 2.4 mM CaCl<sub>2</sub>, 10 mM glucose)  
31 at 34°C for 30 minutes. Slices were maintained and recorded at room temperature (20–  
32 24°C). The intracellular solution for current clamp recordings contained: 128 mM K  
33 gluconate, 10 mM KCl, 10 mM HEPES, 1 mM EGTA, 1 mM MgCl<sub>2</sub>, 0.3 mM CaCl<sub>2</sub>, 5 mM  
34 Na<sub>2</sub>ATP and 0.3 mM NaGTP, adjusted to pH 7.3 with KOH. All recordings were made

1 using multiclamp 700B amplifier, and the data was filtered at 2 kHz and digitized at 10  
2 kHz. For low glucose conditions, cells were incubated in oxygenated aCSF containing  
3 0.5 mM glucose, with osmolarity adjusted with sucrose. In all studies responding cells  
4 were defined by a stimulus induced change in firing rate or membrane potential that was  
5 2xSD±mean.

Supplemental Figure 1

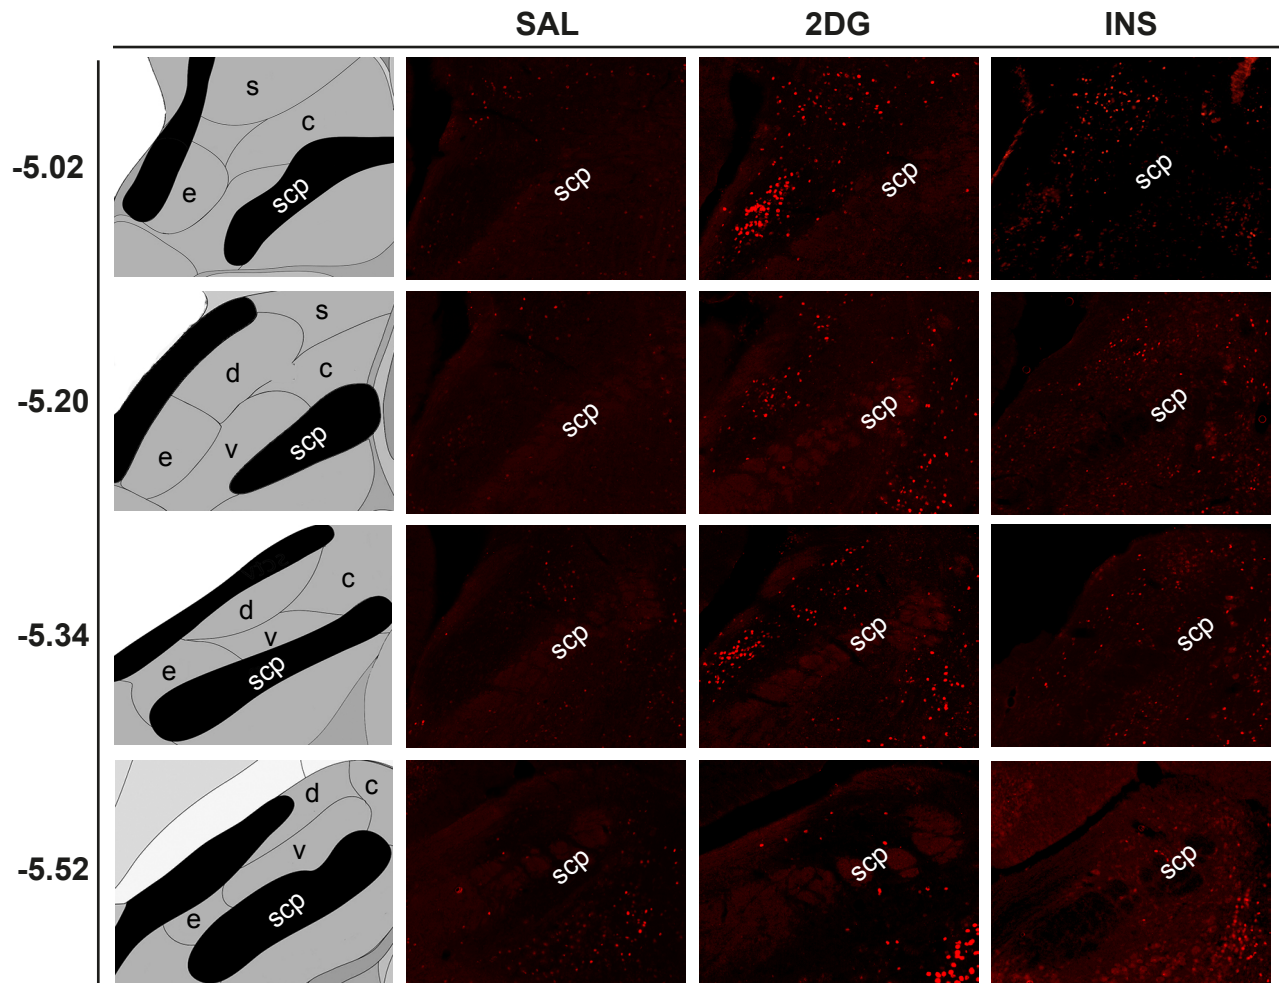



## Supplemental Figure 2

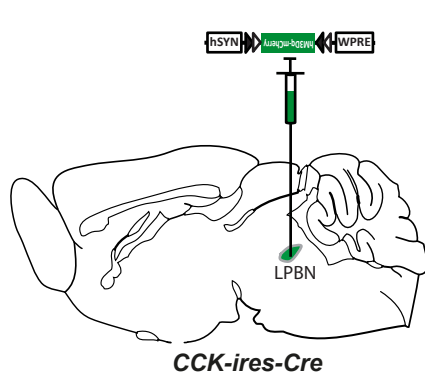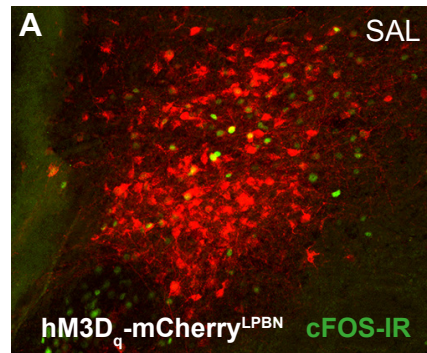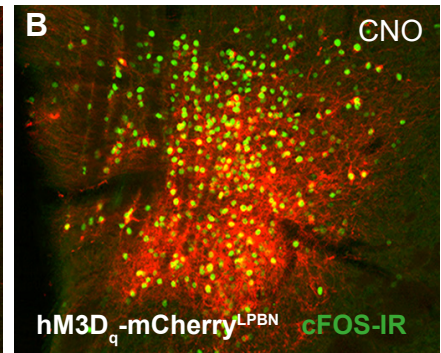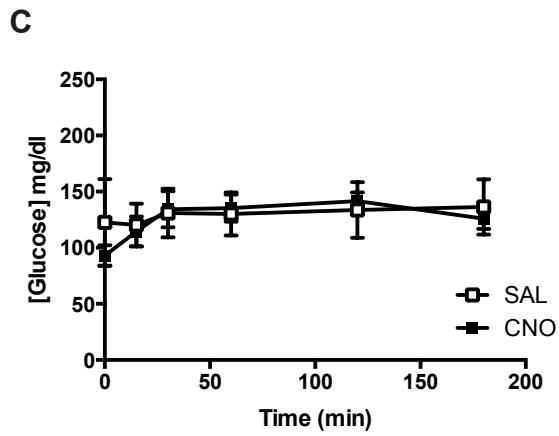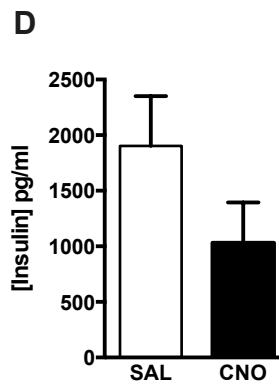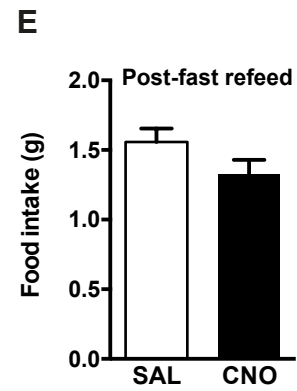

### Supplemental Figure 3

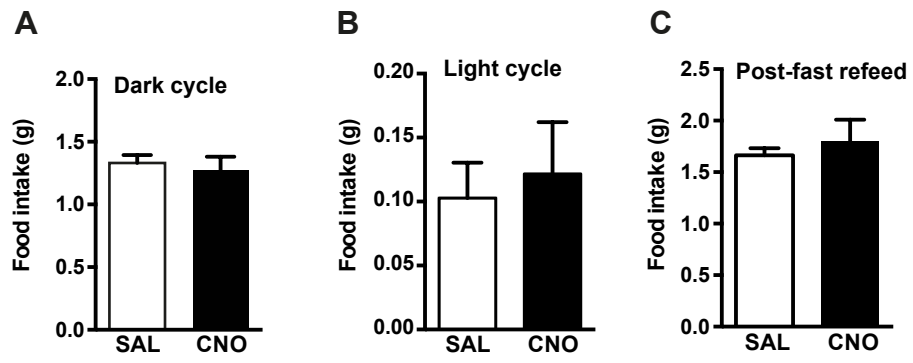

# Supplemental Figure 4

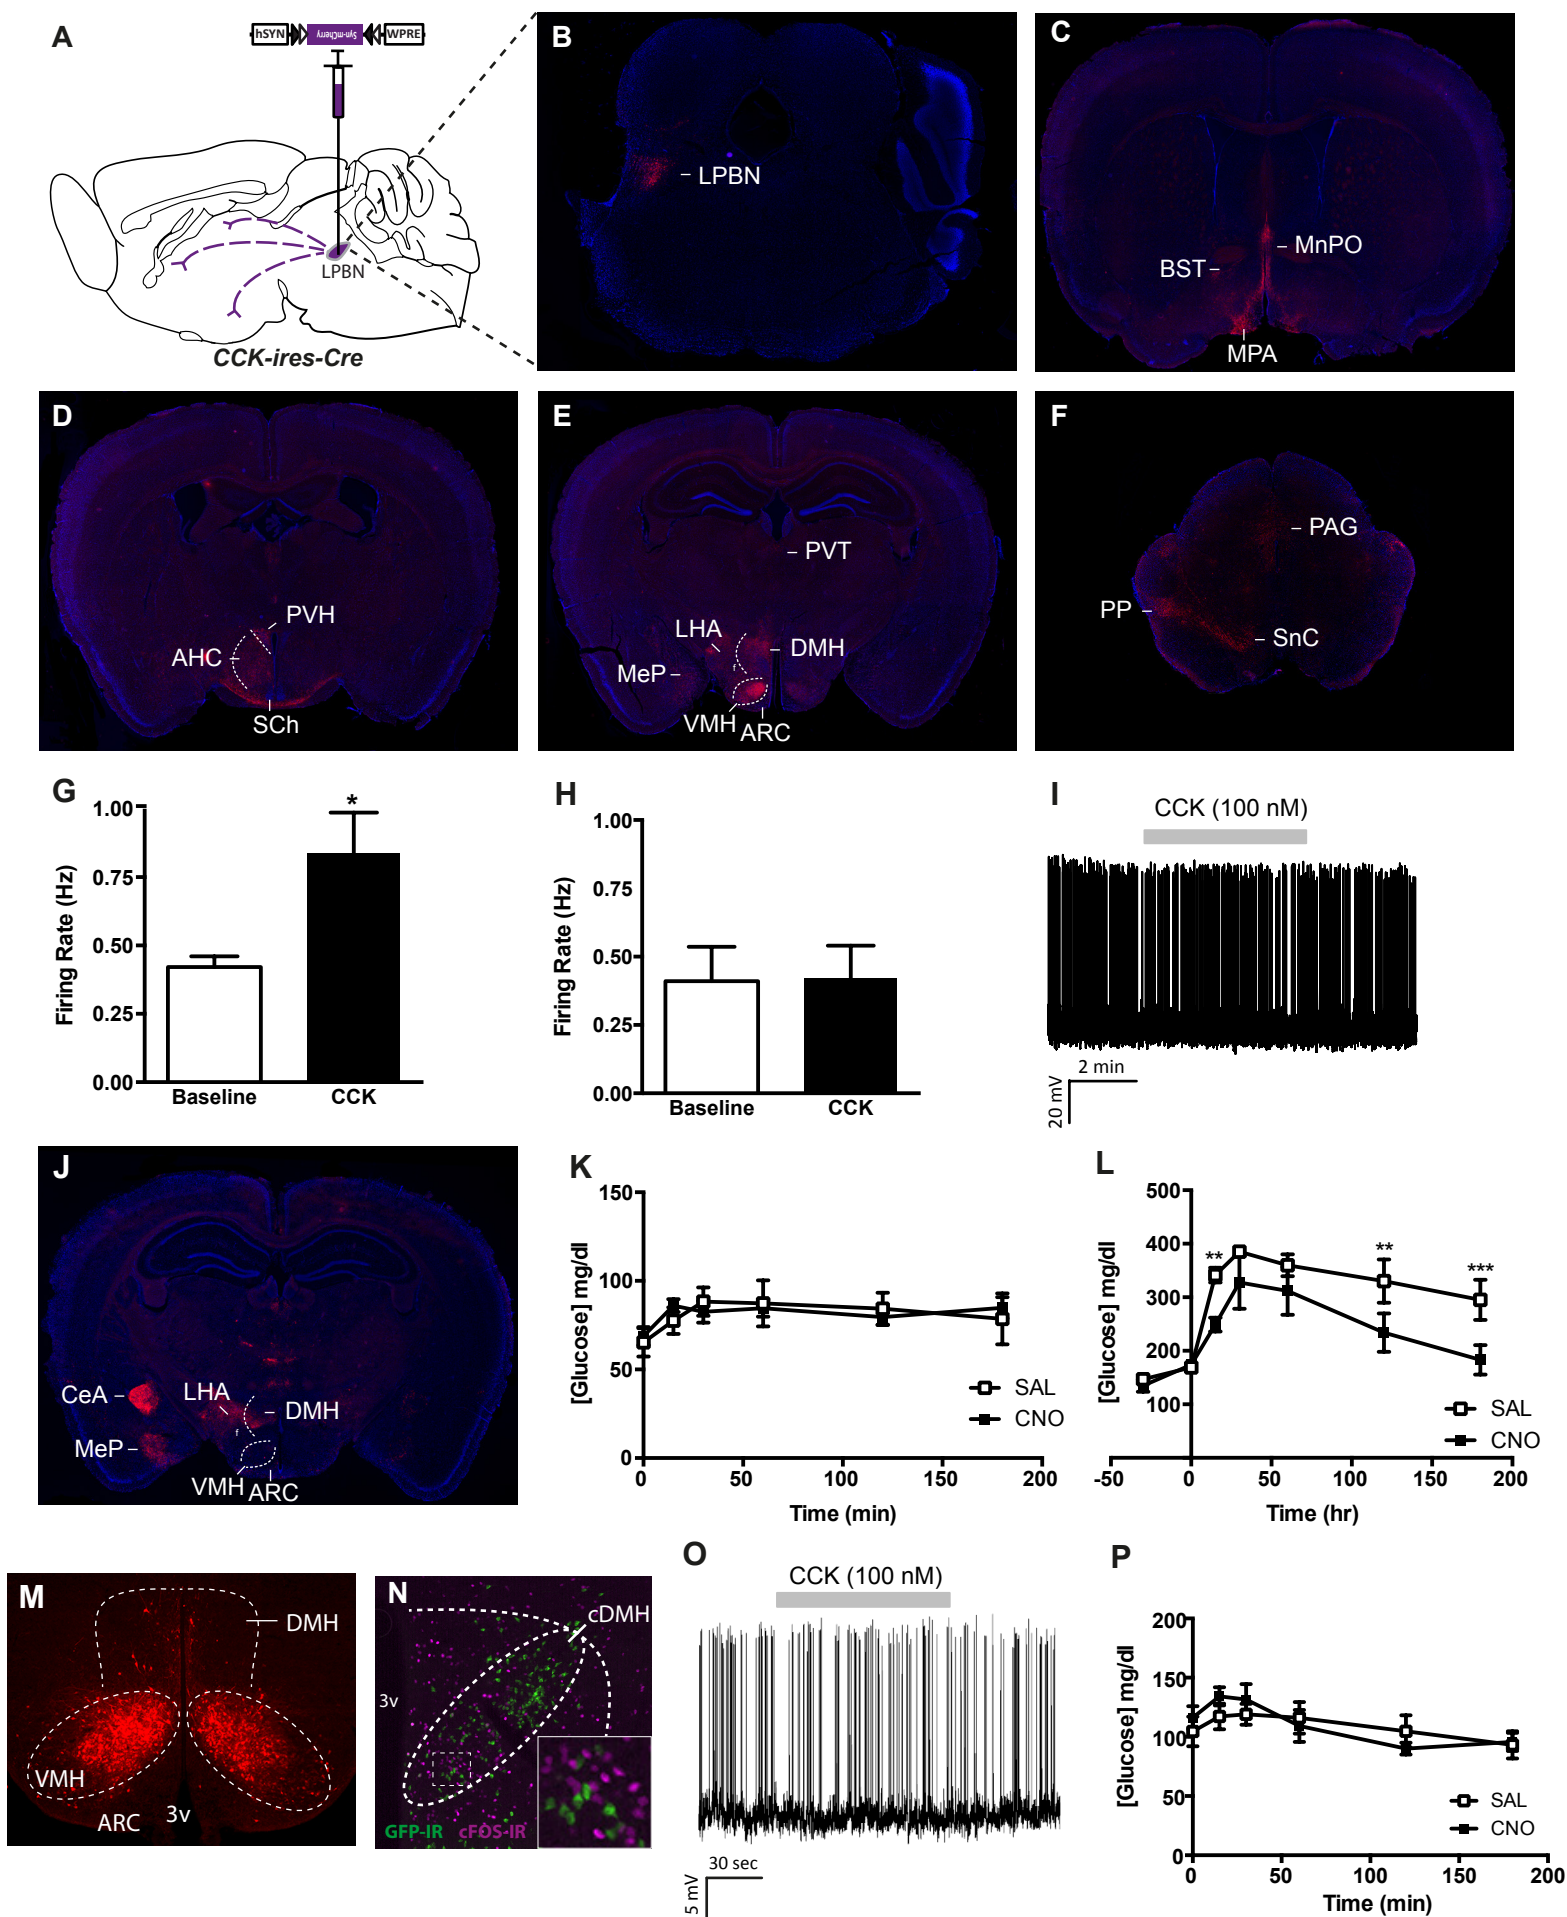

Supplement: mmc1.pdf [file mmc1.pdf]
