# Supplementary material for: A Parabrachial-Hypothalamic Cholecystokinin Neurocircuit Controls Counterregulatory Responses to Hypoglycemia
Source: PubMed Central journal article supplement (PMC4261079; doi:10.1016/j.cmet.2014.11.006), 2014-12-02

# A Parabrachial-Hypothalamic Cholecystokinin Neurocircuit Controls Counterregulatory Responses to Hypoglycemia

Alastair S. Garfield,<sup>1,2,\*</sup> Bhavik P. Shah,<sup>2,7</sup> Joseph C. Madara,<sup>2</sup> Luke K. Burke,<sup>3,4</sup> Christa M. Patterson,<sup>5</sup> Jonathan Flak,<sup>5</sup> Rachael L. Neve,<sup>6</sup> Mark L. Evans,<sup>3</sup> Bradford B. Lowell,<sup>2</sup> Martin G. Myers, Jr.,<sup>5</sup> and Lora K. Heisler<sup>4</sup>

<sup>1</sup>Centre for Integrative Physiology, Hugh Robson Building, University of Edinburgh, Edinburgh, EH8 9XD, UK

<sup>2</sup>Division of Endocrinology, Diabetes and Metabolism, Department of Medicine, Beth Israel Deaconess Medical Center, Harvard Medical School, Boston, MA 02115, USA

<sup>3</sup>Department of Medicine and Wellcome Trust/Medical Research Council Institute of Metabolic Science, University of Cambridge, Cambridge, CB2 0QQ, UK

<sup>4</sup>Rowett Institute of Nutrition and Health, University of Aberdeen, Aberdeen, AB25 2ZD, UK

<sup>5</sup>Division of Metabolism, Endocrinology, and Diabetes, Department of Internal Medicine, University of Michigan, Ann Arbor, MI 48105, USA

<sup>6</sup>Picower Institute for Learning and Memory, Department of Brain and Cognitive Sciences, Massachusetts Institute of Technology, Cambridge, MA 02139, USA

<sup>7</sup>Present address: Cardiovascular and Metabolic Diseases, Pfizer, Cambridge, MA 02139, USA

\*Correspondence: [agarfiel@bidmc.harvard.edu](mailto:agarfiel@bidmc.harvard.edu)

<http://dx.doi.org/10.1016/j.cmet.2014.11.006>

## SUMMARY

Hypoglycemia engenders an autonomically mediated counterregulatory (CR)-response that stimulates endogenous glucose production to maintain concentrations within an appropriate physiological range. Although the involvement of the brain in preserving normoglycemia has been established, the neurocircuitry underlying centrally mediated CR-responses remains unclear. Here we demonstrate that lateral parabrachial nucleus cholecystokinin (CCK<sup>LPBN</sup>) neurons are a population of glucose-sensing cells (glucose inhibited) with counterregulatory capacity. Furthermore, we reveal that steroidogenic-factor 1 (SF1)-expressing neurons of the ventromedial nucleus of the hypothalamus (SF1<sup>VMH</sup>) are the specific target of CCK<sup>LPBN</sup> glucoregulatory neurons. This discrete CCK<sup>LPBN</sup> → SF1<sup>VMH</sup> neurocircuit is both necessary and sufficient for the induction of CR-responses. Together, these data identify CCK<sup>LPBN</sup> neurons, and specifically CCK neuropeptide, as glucoregulatory and provide significant insight into the homeostatic mechanisms controlling CR-responses to hypoglycemia.

## INTRODUCTION

Due to the serious pathophysiological consequences of low blood glucose, normoglycemia is a tightly defended state regulated by a conserved and coordinated network of peripheral and central systems. Sensory information from peripheral glucosensors is integrated into the wider glucoregulatory/sensory circuitry, defined principally by the brainstem and hypothalamus, which in turn engages the sympathetic nervous system (SNS)

and hypothalamic-pituitary-adrenal axis to stimulate glucose production and inhibit glucose uptake (Marty et al., 2007). Yet, it is unclear how these disparate structures converge to orchestrate sensorimotor responses to dysglycemia.

The lateral parabrachial nucleus (LPBN) forms part of the pre-autonomic circuitry that subserves physiological responses to numerous viscerosensory modalities, including nociception (Hermanson et al., 1998), thermostasis (Nakamura and Morrison, 2008), malaise (Carter et al., 2013), and energy homeostasis (Wu et al., 2012). As an assimilatory interoceptive relay for ascending sensory information, the LPBN is therefore neuroanatomically positioned to respond to various aspects of homeostatic dysregulation (Saper, 2002). Indeed, the LPBN has been implicated in responses to hypoglycemia (Briski, 1999; Fujiwara et al., 1988; Ritter and Dinh, 1994), but detailed characterization has hitherto been lacking.

## RESULTS AND DISCUSSION

### CCK<sup>LPBN</sup> Neurons Are Responsive to CR-Stimuli

The functional diversity of the LPBN is underscored by a complex anatomical substructure and neurochemical composition (Fulwiler and Saper, 1984). To determine regions of hypoglycemic responsiveness, glucoprivation was pharmacologically induced through administration of the glucose anti-metabolite 2-deoxyglucose (2DG) or insulin (INS) and cFOS-immunoreactivity (IR), a molecular correlate of neuronal activation, assessed across the rostral-caudal extent of the LPBN. Both stimuli increased LPBN cFOS-IR, although the distribution and number of activated neurons was greater upon 2DG administration (Figure 1A–1D; Figure S1 available online). Of particular note was the common induction of cFOS-IR within the superior LPBN (sLPBN) (Figures 1A–1C and 1E). The neuropeptide CCK is highly expressed within the sLPBN (Fulwiler and Saper, 1985), visualized here using a *CCK-ires-Cre::R26-loxSTOPlox-L10-GFP* line (Figures 1F and 1G). 2DG and INS treatment significantly

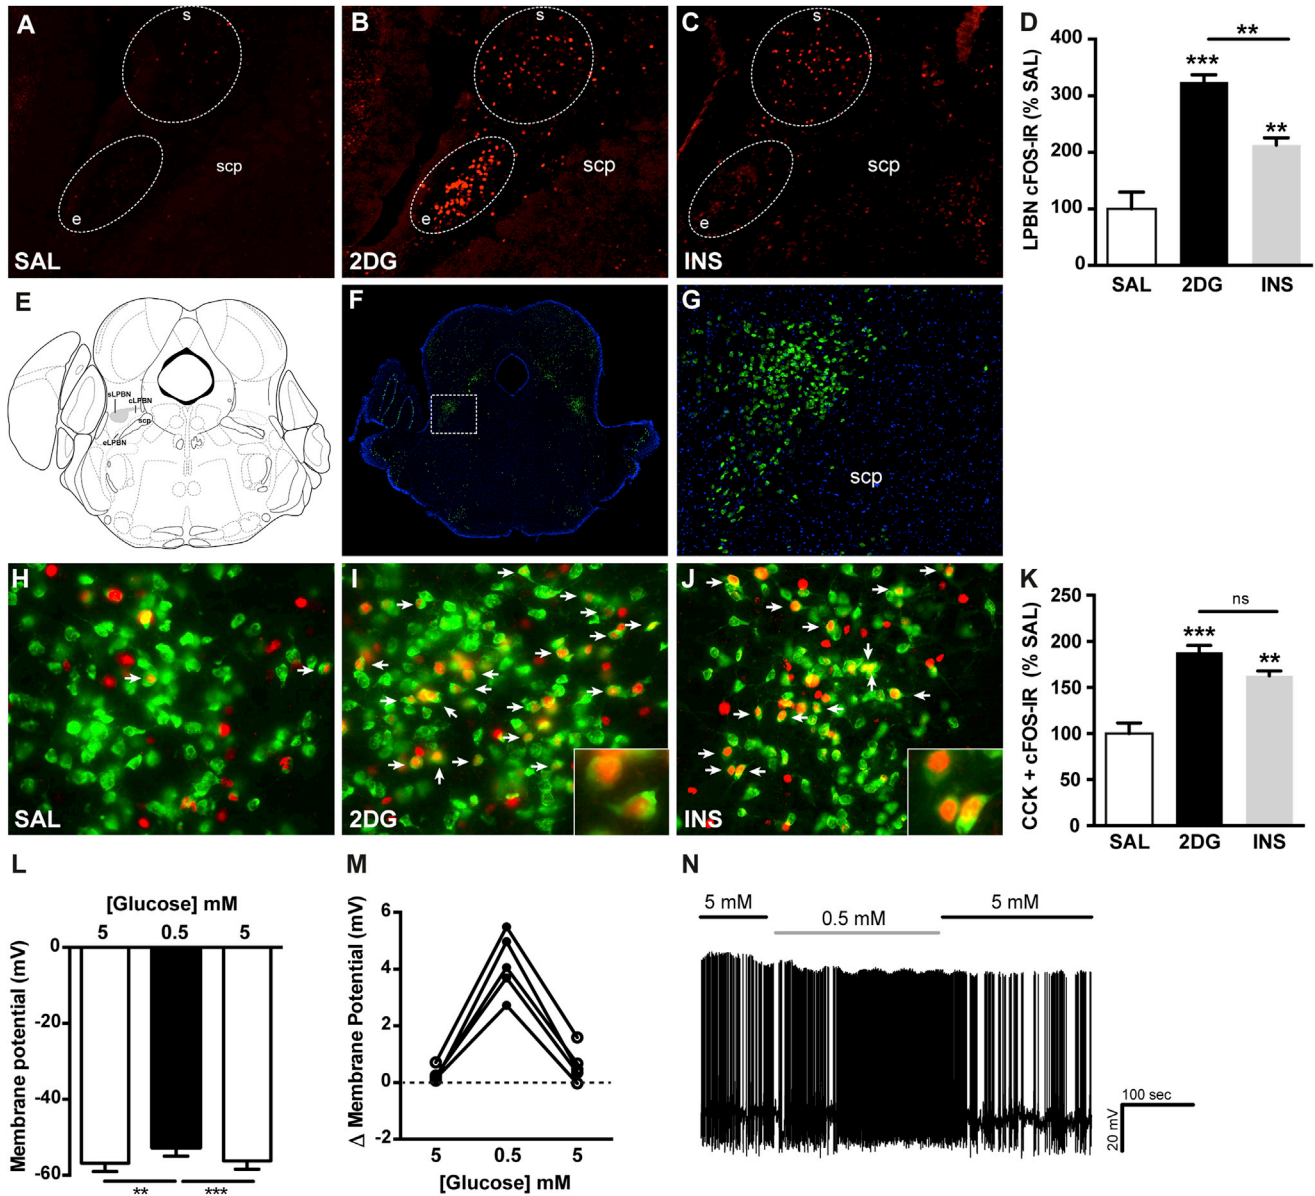

**Figure 1. CCK<sup>LPBN</sup> Neurons Are Activated by Glucoprivation**

(A–D) 2DG- and INS-induced glucoprivation promoted cFOS-IR (red) within the LPBN, as compared to saline controls. Both glucoprivic stimuli elicited cFOS-IR within the sLPBN (B,C), with 2DG also increasing neural activity within the external compartment of the LPBN (B).

(D) Quantification of cFOS-IR across the rostral-to-caudal extent of the LPBN (see Figure S1) revealed a significant elevation of cFOS-IR in 2DG- and INS-treated mice above saline controls (n = 3–5 per group; one-way ANOVA,  $F_{(2,8)} = 31.1$ ,  $p = 0.0002$  with Tukey's post hoc comparison).

(E–G) The sLPBN is located at the rostral and dorsal extreme of the LPBN and defined by the expression of CCK.

(F and G) Transgenic labeling of CCK neurons (green) in a *CCK-ires-Cre::R26-loxSTOPlox-L10-GFP* mouse line recapitulated the known endogenous expression profile.

(H–K) 2DG- and INS-induced glucoprivation increased cFOS-IR (red) within CCK<sup>LPBN</sup> neurons (green) compared to saline controls (white arrows denote colocalized neurons) (n = 3–5 per group; one-way ANOVA,  $F_{(2,9)} = 23.2$ ,  $p = 0.0003$  with Tukey's post hoc comparison).

(L–N) A subset of CCK<sup>LPBN</sup> neurons were inhibited by glucose.

(L and M) 5/14 CCK<sup>LPBN</sup> neurons exhibited reversible membrane depolarization in response to a downward glucose step from 5 mM to 0.5 mM (n = 5, repeated-measures one-way ANOVA,  $F_{(2,4)} = 77.3$ ,  $p = 0.0003$  with Tukey's post hoc comparison).

(N) Representative electrophysiological trace from a spontaneously active glucose-inhibited CCK<sup>LPBN</sup> neuron.

2DG, 2-deoxyglucose; e, external LPBN; INS, insulin; SAL, saline; scp, superior cerebellar peduncle; s, superior LPBN. All data are presented as mean ± SEM. \*\*p < 0.01; \*\*\*p < 0.001.

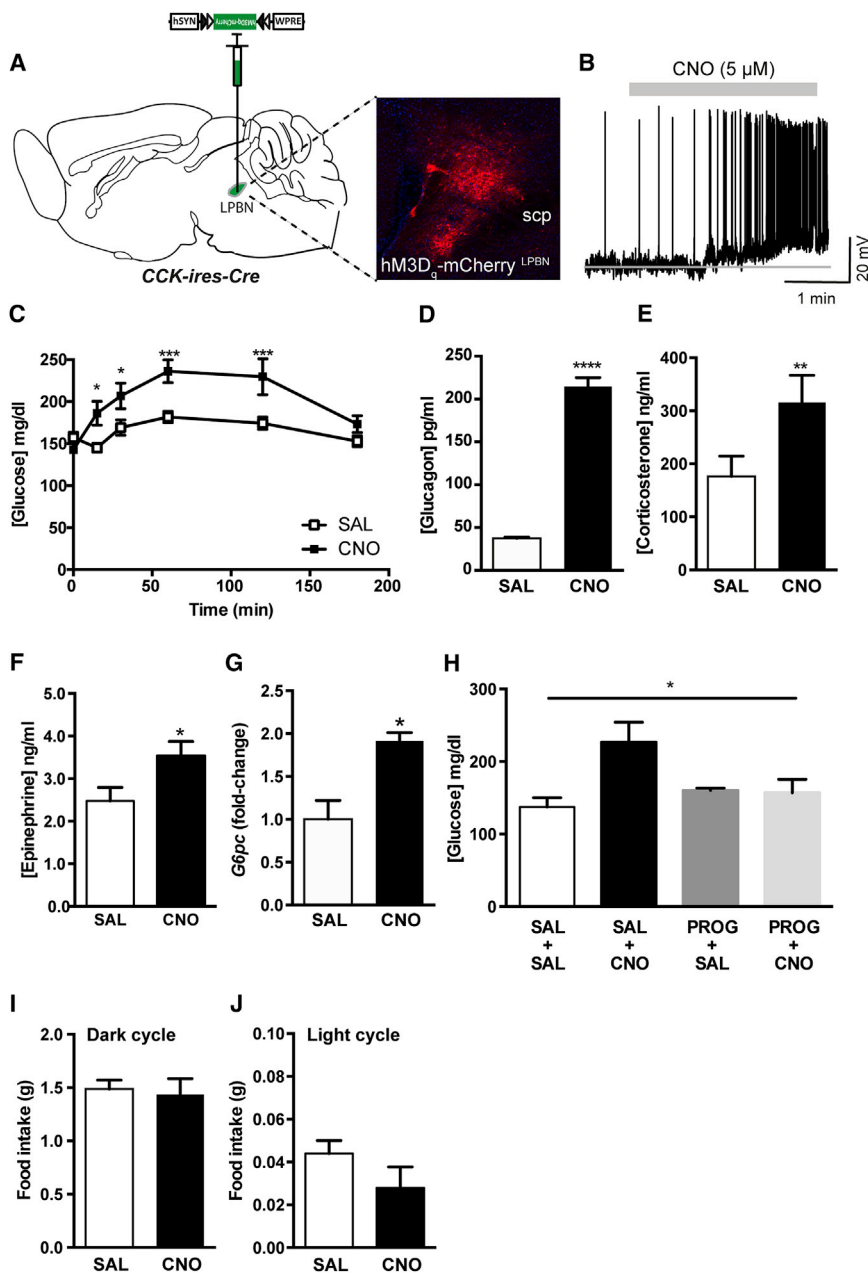

**Figure 2. CCK<sup>LPBN</sup> Neurons Promote SNS-Mediated CR-Like Responses**

(A and B) Bilateral stereotaxic injection of Cre-dependent excitatory hM3D<sub>q</sub>-mCherry virus into the LPBN of male CCK-ires-Cre mice facilitated real-time activation of CCK<sup>LPBN</sup> neurons.

(A) Representative image of Cre-dependent expression of hM3D<sub>q</sub>-mCherry specifically within the LPBN of a CCK-ires-Cre mouse.

(B) Membrane potential and firing rate of CCK-ires-Cre::hM3D<sub>q</sub>-mCherry<sup>LPBN</sup> neurons increased upon 5 μM CNO application.

(C) CCK-ires-Cre::hM3D<sub>q</sub>-mCherry<sup>LPBN</sup> mice exhibited a significant hyperglycemic response to CNO, compared to saline, administration (n = 7; repeated-measures ANOVA, main effect of treatment [F<sub>(1,36)</sub> = 39.6, p < 0.0001], main effect of time [F<sub>(5,36)</sub> = 6.6, p = 0.0002], and interaction [F<sub>(5,36)</sub> = 4.3, p = 0.003]; post hoc comparisons determined by Sidak's post hoc test for individual time point analysis).

(D–F) CNO treatment evoked an increase in serum glucagon (D; n = 3 per group; t test, t<sub>(4)</sub> = 26.0, p < 0.0001), corticosterone (E; n = 3 to 4 per group; t test, t<sub>(6)</sub> = 4.4, p = 0.004), and epinephrine concentrations (F; n = 6–8 per group; t test, t<sub>(12)</sub> = 2.3, p = 0.04).

(G) CCK<sup>LPBN</sup> neuron activation was associated with increased hepatic G6pc mRNA expression (n = 3 to 4 per group; t test, t<sub>(4)</sub> = 2.7, p = 0.05) compared to saline controls.

(H) CNO-induced hyperglycemia was abolished by pretreatment with pan-specific CCK-receptor antagonist (20 mg/kg proglumide: PROG) (data shown at 60 min after CNO/SAL administration; n = 5; repeated-measures ANOVA, F<sub>(4,12)</sub> = 5.0, p = 0.04 with Tukey's post hoc comparison).

(I and J) CNO treatment did not influence feeding behavior compared to saline. (I) Three hour dark-cycle food intake (n = 10; paired t test, t<sub>(9)</sub> = 0.4, p = 0.7) and (J) 3 hr light-cycle food intake (n = 5; paired t test, t<sub>(4)</sub> = 1.8, p = 0.1) in ad-libitum-fed mice.

CNO, clozapine-N-oxide; G6pc, glucose-6-phosphatase; scp, superior cerebellar peduncle; SAL, saline. All data are presented as mean ± SEM; \*p < 0.05, \*\*p < 0.01, \*\*\*p < 0.001, \*\*\*\*p < 0.0001.

increased cFOS-IR within CCK<sup>LPBN</sup> neurons (Figures 1H–1K). This identifies CCK<sup>LPBN</sup> neurons as one neurochemically defined subpopulation of LPBN cells responsive to states of glucoprivation, in addition to other non-CCK-expressing cells. To determine the proximal glucoprivic stimulus to which CCK<sup>LPBN</sup> neurons are responsive, we assessed their capacity to sense shifts in extracellular glucose concentration. Whole-cell recordings from transgenically labeled CCK<sup>LPBN</sup> neurons demonstrated that a downward step from 5 mM to 0.5 mM resulted in reversible membrane depolarization in 5/14 cells and in spontaneously firing cells an increase in action potential firing rate (Figures 1L–1N; responding cells defined by a poststimulus response greater than 2 × SD ± mean of recorded baseline), establishing these cells as a population of glucose-inhibited neurons.

### CCK<sup>LPBN</sup> Neuron Activation Induces CR-Like Responses

To probe the relevance of CCK<sup>LPBN</sup> neurons to glucoregulation, a chemogenetic interrogation of their physiological function using Designer Receptors Activated by Designer Drugs (DREADD) (Alexander et al., 2009) was undertaken. Cre-dependent viral transduction of CCK<sup>LPBN</sup> neurons with stimulatory hM3D<sub>q</sub>-mCherry facilitated robust activation in response to the designer drug clozapine-N-oxide (CNO), as determined by ex vivo slice electrophysiology (Figures 2A and 2B) and in vivo cFOS-IR (Figures S2A and S2B). In freely behaving animals, CCK-ires-Cre::hM3D<sub>q</sub>-mCherry<sup>LPBN</sup> neuron activation prompted an increase in blood glucose concentration that reached a maximal elevation above baseline by 60 min (Figure 2C) (CNO administration had no effect on blood glucose concentration in the

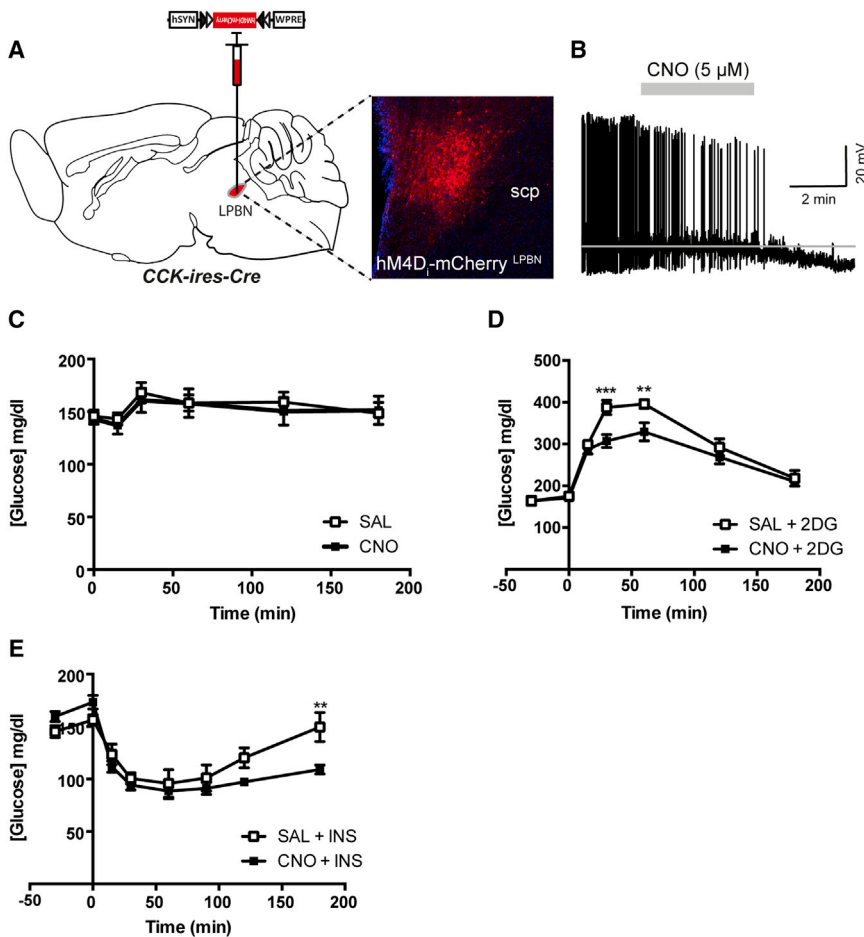

**Figure 3. CCK<sup>LPBN</sup> Neurons Are Necessary for CR-Response to Glucoprivation**

(A and B) Bilateral stereotaxic injection of Cre-dependent inhibitory hM4Di-mCherry virus into the LPBN of male *CCK-ires-Cre* mice facilitated the real-time inhibition of CCK<sup>LPBN</sup> neurons.

(A) Representative image of Cre-dependent expression of hM4Di-mCherry specifically within the LPBN of a *CCK-ires-Cre* mouse.

(B) Membrane potential and firing rate of *CCK-ires-Cre::hM4Di-mCherry*<sup>LPBN</sup> neurons decreased upon 5  $\mu$ M CNO application.

(C) CNO-induced CCK<sup>LPBN</sup> neuron silencing in normoglycemic *CCK-ires-Cre::hM4Di-mCherry*<sup>LPBN</sup> mice had no effect on blood glucose levels, compared to saline controls ( $n = 11$ ; repeated-measures ANOVA, main effects of treatment and time, and interaction, not significant).

(D and E) CNO-induced CCK<sup>LPBN</sup> neuron silencing under glucoprivic conditions attenuated the CR-response.

(D) 2DG-induced CR was significantly diminished by CNO pretreatment compared to saline ( $n = 8$ ; repeated-measures ANOVA, main effect of treatment [ $F_{(1,49)} = 14.3$ ,  $p < 0.0004$ ], main effect of time [ $F_{(6,49)} = 64.7$ ,  $p < 0.0001$ ], and interaction [ $F_{(6,49)} = 2.8$ ,  $p = 0.02$ ]; post hoc comparisons determined by Sidak's post hoc test for individual time point analysis).

(E) Likewise, INS-induced CR was significantly diminished by CNO pretreatment compared to saline ( $n = 5$ ; repeated-measures ANOVA, main effect of treatment [ $F_{(1,32)} = 4.6$ ,  $p = 0.04$ ], main effect of time [ $F_{(7,32)} = 22.3$ ,  $p < 0.0001$ ], and interaction [ $F_{(7,32)} = 2.8$ ,  $p = 0.02$ ]; post hoc comparisons determined by Sidak's post hoc test for individual time point analysis).

Abbreviations: 2DG, 2-deoxyglucose; INS, insulin; scp, superior cerebellar peduncle; SAL, saline. All data are presented as mean  $\pm$  SEM.; \*\* $p < 0.01$ ; \*\*\* $p < 0.001$ ; \*\*\*\* $p < 0.0001$ .

absence of DREADD-receptor expression; Figure S2C). Coincident with this rise in blood glucose, CNO administration significantly elevated serum levels of the CR hormones glucagon and corticosterone (Figures 2D and 2E) but had no significant effect on serum INS levels, although there was a trend toward a decrease (Figure S2D). Furthermore, CCK<sup>LPBN</sup> neuron activation also stimulated sympathoexcitatory drive to the adrenal glands, as indicated by increased serum epinephrine levels (Figure 2F), indicating that these cells couple to the SNS-circuitry requisite for autonomic control of endogenous glucose production. Consistent with these findings, mRNA levels of the glucogenic gene glucose-6-phosphatase (*G6pc*) increased 2-fold in livers of CNO-treated *CCK-ires-Cre::hM3D<sub>q</sub>-mCherry*<sup>LPBN</sup> mice, compared to saline controls (Figure 2G). We next investigated the necessity of CCK neurotransmission for *CCK-ires-Cre::hM3D<sub>q</sub>-mCherry*<sup>LPBN</sup>-induced hyperglycemia. Systemic pretreatment of *CCK-ires-Cre::hM3D<sub>q</sub>-mCherry*<sup>LPBN</sup> mice with the CCK-receptor antagonist proglumide abrogated the previously observed elevation in blood glucose (Figure 2H), revealing that LPBN-derived CCK is the functionally relevant neurotransmitter in this physiological context. These data demonstrate that the CCK<sup>LPBN</sup> neurons, and specifically

CCK neuropeptide, are sufficient to drive CR-like responses. Interestingly, despite the involvement of both the LPBN (Wu et al., 2012) and CCK (Little et al., 2005) in appetite control, CCK<sup>LPBN</sup> neuron activation had no impact on feeding behavior (Figures 2I, 2J, and S2E).

### CCK<sup>LPBN</sup> Neurons Are Necessary for a Complete CR-Response

This ability of CCK<sup>LPBN</sup> neurons to elevate blood glucose concentration, together with their responsiveness to glucoprivic stimuli, alluded to an involvement in the CR-responses to hypoglycemia, wherein their activation facilitates the re-establishment of normoglycemia. To address the physiological relevance of CCK<sup>LPBN</sup> neurons to counterregulation, we investigated the consequence of their chemogenetic inhibition within the context of glucoprivation. Ex vivo electrophysiology demonstrated that in the presence of CNO, *CCK-ires-Cre::hM4Di-mCherry*<sup>LPBN</sup> neurons exhibited membrane hyperpolarization and a decrease in action potential firing (Figures 3A and 3B), establishing a capacity to effectively silence CCK<sup>LPBN</sup> neurons. In freely behaving normoglycemic (ad-libitum-fed) *CCK-ires-Cre::hM4Di-mCherry*<sup>LPBN</sup> mice, CNO administration had no effect on blood

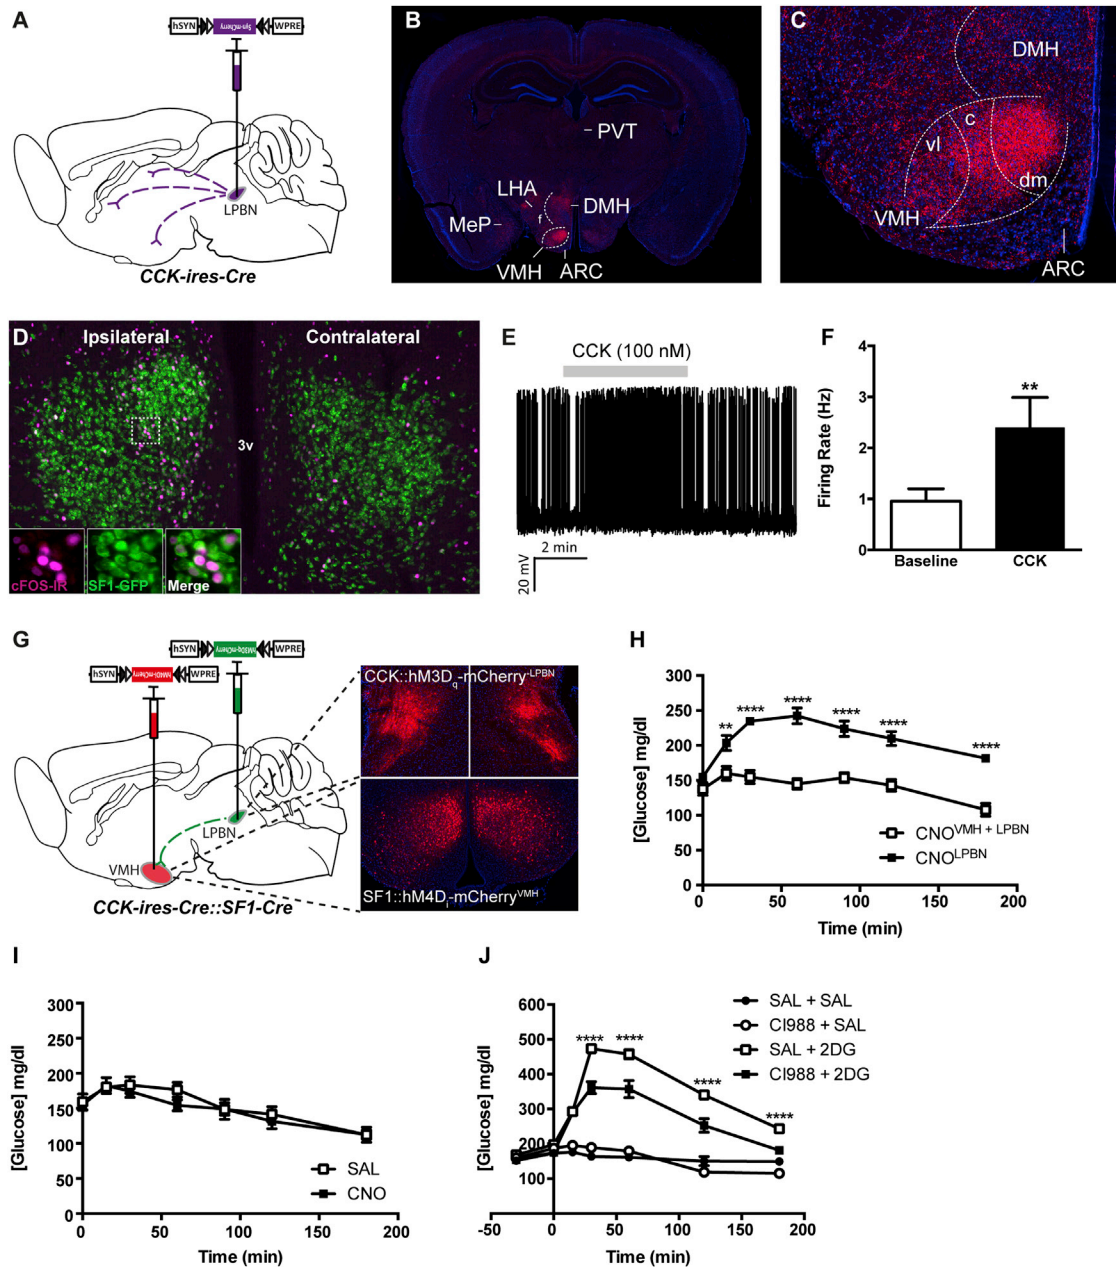

**Figure 4. CCK<sup>LPBN</sup> Neurons Engage SF1<sup>VMH</sup> Neurons to Mediate CR-Responses**

(A) Unilateral stereotaxic injection of Cre-dependent synaptophysin-mCherry virus into the LPBN of *CCK-ires-Cre* mice facilitated genetically defined tract tracing of CCK<sup>LPBN</sup> neuron projections.

(B and C) CCK<sup>LPBN</sup> neurons send ascending projections to the ipsilateral hypothalamus, including the lateral hypothalamus (LH), dorsomedial nucleus (DMH), and VMH.

(D) CNO-mediated activation of unilateral *CCK-ires-Cre::hM3Dq-mCherry<sup>LPBN</sup>* neurons evokes cFOS-IR (magenta) within ipsilateral SF1<sup>VMH</sup> neurons (green) in *CCK-ires-Cre::SF1-Cre::R26-loxSTOPlox-L10-GFP* mice.

(E and F) A total of 55% (5/9) of synaptically isolated SF1<sup>VMH</sup> neurons were activated by CCK (CCK-8S, 100 nM) in ex vivo slice preparations maintained under hypoglycemic conditions (0.5 mM glucose).

(E) Representative electrophysiological trace of a SF1<sup>VMH</sup> neuron demonstrating CCK-induced activation.

(F) CCK-responsive SF1<sup>VMH</sup> neurons exhibited a 2.5-fold increase in firing frequency over baseline upon CCK-8S administration (n = 6, paired t test,  $t_{(4)} = 4.1$ ,  $p = 0.01$ ).

(G and H) Functional occlusion of CCK<sup>LPBN</sup> neuron glucoregulation through concomitant silencing of downstream SF1<sup>VMH</sup> neurons.

(H) *SF1-Cre::hM4D<sub>q</sub>-mCherry<sup>VMH</sup>* silencing prevents the *CCK-ires-Cre::hM3D<sub>q</sub>-mCherry<sup>LPBN</sup>*-mediated CR-response in CNO-treated double transduced mice, as compared to *CCK-ires-Cre::hM3D<sub>q</sub>-mCherry<sup>LPBN</sup>* only transduced mice (n = 5 per group; two way ANOVA, main effect of treatment [ $F_{(1,56)} = 188.2$ ,  $p < 0.0001$ ], main effect of time [ $F_{(6,56)} = 11.9$ ,  $p < 0.0001$ ], and interaction [ $F_{(6,56)} = 4.5$ ,  $p = 0.0009$ ]; Sidak's post hoc test for individual time point analysis).

(legend continued on next page)

glucose concentration (Figure 3C), revealing that these cells are not requisite to the regulation of baseline glycemia. However, CCK<sup>LPBN</sup> neuron silencing prior to the induction of acute glucoprivation resulted in a significantly diminished CR-response. Specifically, while 2DG administration prompted the expected CR elevation in blood glucose, prior CCK-ires-Cre::hM4D<sub>q</sub>-mCherry<sup>LPBN</sup> neuron inhibition markedly attenuated the hyperglycemic response (Figure 3D). Similarly, under INS-induced hypoglycemia, CCK<sup>LPBN</sup> neuron silencing engendered an exaggerated hypoglycemic response that impaired re-establishment of normoglycemia (Figure 3E). Thus, CCK<sup>LPBN</sup> neurons form part of the neurocircuitry underlying centrally regulated glycemia and are both necessary and sufficient for CR-responses to glucoprivation. CCK<sup>LPBN</sup> neuron silencing did not affect feeding behavior (Figures S3A–S3C).

### CCK<sup>LPBN</sup> Neuron-Mediated CR Requires Downstream SF1<sup>VMH</sup> Neurons

To probe the neurocircuit underlying CCK<sup>LPBN</sup> neuron-mediated glucoregulation, their specific efferent targets were assessed using genetically encoded neuronal tract-tracing. Unilateral viral transduction of CCK<sup>LPBN</sup> neurons with Cre-dependent synaptophysin-mCherry revealed a strictly ascending projection profile, with terminals concentrated predominantly within the ipsilateral hypothalamus (Figures 4A–4C and S4A–S4F). The densest site of CCK<sup>LPBN</sup> neuron innervation was the ventromedial nucleus of the hypothalamus (VMH), and in particular the dorsomedial compartment (dmVMH) (Figure 4C). This robust innervation, together with the well-established glucoregulatory capacity and preautonomic function of the VMH (Borg et al., 1994; Borg et al., 1995; Choi et al., 2013), supported its role as a site of functional outflow for CR CCK<sup>LPBN</sup> neurons.

SF1 is required for the terminal differentiation of the VMH and is expressed predominantly in the dmVMH of adult mice (Choi et al., 2013). Conditional genetic manipulations have demonstrated that SF1 neurons are required for CR-response to hypoglycemia (Kim et al., 2012; Klöckener et al., 2011; Tong et al., 2007). Thus, we investigated whether SF1<sup>VMH</sup> neurons form part of a glucoregulatory CCK<sup>LPBN</sup> → VMH microcircuit. Concordant with the lateralized nature of CCK<sup>LPBN</sup> neuron projections, unilateral CCK-ires-Cre::hM3D<sub>q</sub>-mCherry<sup>LPBN</sup> neuron activation induced an increase in cFOS-IR within transgenically labeled ipsilateral SF1<sup>VMH</sup> neurons, as compared to the contralateral side, indicating that SF1<sup>VMH</sup> neurons lie downstream of CCK<sup>LPBN</sup> neurons (Figure 4D). Consistent with this observation and the excitatory effect of CCK on the VMH (Kow and Pfaff, 1986), electrophysiological recordings from synaptically isolated SF1<sup>VMH</sup> neurons at low (0.5 mM) and normal (5 mM) glucose conditions revealed that 55% (5/9) were stimulated by exogenous CCK, with responding cells increasing their firing rate 2.5-fold (Figures

4E, 4F, and S4G); importantly, pretreatment of slices with a CCK<sub>B</sub>-receptor antagonist (CI988) blocked responses to CCK in all cells tested (n = 12). Non-SF1<sup>VMH</sup> neurons did not exhibit a response to CCK (0/12 cells; Figures S4H and S4I). In light of evidence that LPBN-derived CCK is the sole source of CCK terminals within the VMH (Nagai et al., 1987), these data suggest SF1<sup>VMH</sup> neuron responsiveness to CCK lies in their innervation by CCK<sup>LPBN</sup> neurons. Furthermore, the robustly glutamatergic nature of the LPBN led us to consider the potential contribution of fast neurotransmission from CCK<sup>LPBN</sup> neurons. Interestingly, we did not observe VMH projections from glutamatergic vGLUT2<sup>LPBN</sup> neurons (Figure S4J), and vGLUT2-ires-Cre::hM3D<sub>q</sub>-mCherry<sup>LPBN</sup> stimulation failed to elevate blood glucose levels (Figure S4K). These data suggest that VMH-projecting CCK<sup>LPBN</sup> neurons are not glutamatergic and support our observation that CCK receptor blockade is sufficient to abrogate the hyperglycemic response to CNO in CCK-ires-Cre::hM3D<sub>q</sub>-mCherry<sup>LPBN</sup> mice (Figure 2H).

Taking advantage of the spatial exclusivity of CCK and SF1 expression in the LPBN and VMH, respectively, we next generated compound CCK-ires-Cre::SF1-Cre mice to facilitate neurochemically explicit manipulation of this CCK<sup>LPBN</sup> → SF1<sup>VMH</sup> microcircuit. Specifically, we sought to functionally occlude CCK-ires-Cre::hM3D<sub>q</sub>-mCherry<sup>LPBN</sup>-induced CR-responses through the simultaneous silencing of downstream SF1-Cre::hM4D<sub>q</sub>-mCherry<sup>VMH</sup> neurons (Figure 4G). Concomitant CNO-induced activation and inhibition of CCK<sup>LPBN</sup> and SF1<sup>VMH</sup> neurons, respectively, resulted in abrogation of CCK-ires-Cre::hM3D<sub>q</sub>-mCherry<sup>LPBN</sup>-mediated elevation in blood glucose (Figure 4H). Silencing of SF1<sup>VMH</sup> neurons alone had no effect on blood glucose concentration, indicating a causal interaction between these two populations, and not simply a counteracting additive effect (Figure 4I). Furthermore, like CCK<sup>LPBN</sup> neurons, silencing of SF1<sup>VMH</sup> cells within the context of 2DG-glucoprivation induced an attenuated CR-response (Figure S4L). Control experiments performed to rule out any contribution from CCK neurons within the dorsomedial nucleus of the hypothalamus, compact part (cdMH), which neighbors the SF1<sup>VMH</sup> domain, revealed that CCK<sup>cdMH</sup> neurons had neither any effect on blood glucose levels nor were engaged by glucoregulatory CCK<sup>LPBN</sup> neurons (Figures S4M–S4P). These data suggest that the CR function of CCK<sup>LPBN</sup> neurons is predicated upon their engagement of downstream SF1<sup>VMH</sup> neurons. Interestingly, systemic antagonism of CCK<sub>B</sub>-receptors, the predominant central receptor isoform (and enriched in the dmVMH), was sufficient to significantly attenuate the hyperglycemic response to 2DG in wild-type mice (Figure 4J), highlighting the salience of CCK<sub>B</sub>-receptor signaling to CR-responses, although not definitively identifying specific receptor-expressing neuronal populations.

(I) SF1<sup>VMH</sup> neuron silencing does not influence blood glucose concentrations compared to saline (n = 4; repeated-measures ANOVA; main effects of treatment, time, and interaction not significant).

(J) The CR-response to 2DG was significantly attenuated by pretreatment with the selective CCK<sub>B</sub>-receptor antagonist CI988 (n = 5 per group; two-way ANOVA; main effect of treatment [ $F_{(3,112)} = 369.1$ ,  $p < 0.0001$ ], main effect of time [ $F_{(6,112)} = 121.7$ ,  $p < 0.0001$ ], and interaction [ $F_{(18,112)} = 36.2$ ,  $p < 0.001$ ]; post hoc comparisons determined by Tukey's post hoc test for individual time point analysis).

Abbreviations: ARC, arcuate nucleus of the hypothalamus; DMH, dorsomedial nucleus of the hypothalamus; LHA, lateral hypothalamic area; MeP, medial amygdaloid nucleus posterior part; PVT, paraventricular nucleus of the thalamus; SAL, saline; VMH, ventromedial nucleus of the hypothalamus; c, central; vl, ventrolateral; dm, dorsomedial. All data are presented as mean ± SEM; \* $p < 0.05$ ; \*\*\* $p < 0.001$ ; \*\*\*\* $p < 0.0001$ .

Here we demonstrate that CCK<sup>LPBN</sup> neurons are a population of glucose-sensitive neurons and a requisite component of the neurocircuitry underlying CR-responses to hypoglycemia. Furthermore, the necessity for SF1<sup>VMH</sup> neurons as downstream effectors of CCK<sup>LPBN</sup>-regulated glycemia befits their established role in CR (Choi et al., 2013; Kim et al., 2012; Tong et al., 2007). In sum, the present study defines the physiological function of a discrete CCK<sup>LPBN</sup> → SF1<sup>VMH</sup> microcircuit that drives hepatic glucose production and mediates CR responses to hypoglycemia. Furthermore, these data identify a critical function for CCK in the physiological response to glucoprivation. These observations have salience to both homeostatic function in health and dysregulation in disease, in particular diabetes.

## EXPERIMENTAL PROCEDURES

### Animals

CCK-ires-Cre (Jackson Laboratories), SF1-Cre, vGLUT2-ires-Cre, and R26-loxSTOPlox-L10-GFP mice were generated and maintained as previously described (Dhillon et al., 2006; Krashes et al., 2014; Taniguchi et al., 2011). Animal care and experimental procedures were performed with approval by the Beth Israel Deaconess Medical Center Institutional Animal Care and Use Committee or were performed in accordance with the UK Animals (Scientific Procedures) Act 1986.

### Viruses

The DREADD viruses used have been described previously: AAV8-hSyn-DIO-hM3D<sub>q</sub>-mCherry and AAV8-hSyn-DIO-hM4D<sub>q</sub>-mCherry (University North Carolina Vector Core) (Krashes et al., 2011). A Cre-dependent expression cassette for hEF1alpha-DIO-synaptophysin-mCherry-WPRE (Opland et al., 2013) was generated (MIT Viral Gene Transfer Core) and the construct packaged in AAV serotype-8 at a titer of  $1.3 \times 10^{13}$  vg/ml (Virovek, Inc). Nucleus specific delivery of viruses was achieved through stereotaxic delivery based upon coordinates defined by the Mouse Brain Atlas (Franklin and Paxinos, 2008).

### Blood Glucose Studies

On test days, mice were transferred to new cages and food removed at 9:00 am. Mice remained fasted until 1:00 pm, when the experiment would commence. Blood glucose concentration was determined by tail bleed using a OneTouch Ultra glucometer and test strips (LifeScan, Johnson and Johnson Company). Basal blood glucose concentration was determined prior to injection of any substances and at 15, 30, 60, 120, and 180 min postadministration. Pretreatments were given 30 min prior to pharmacological stimulus. Experiments were within study design (unless otherwise stated), with mice assessed following saline and 1 mg/kg CNO. Animals undergoing loss-of-function experiments involving glucoprivic stimuli (INS or 2DG) were counterbalanced and given 3 weeks recovery time between treatments to ensure normal counterregulatory responses were intact.

### Immunohistochemistry

Brains were sectioned on a freezing microtome at 30  $\mu$ m. Dual immunofluorescence histochemistry for cFOS-IR, mCherry-IR, and GFP-IR was conducted as previously described (Garfield et al., 2012). Primary antibodies (1/1,000) were as follows: rabbit anti-cFOS (EMD Millipore), rabbit anti-RFP (Clontech Laboratories, Inc.), or chicken anti-GFP (EMD Millipore).

### Serum and Tissue Extraction

For assessment of serum chemistry and hepatic gene expression animals were decapitated, and fresh trunk blood and liver samples were collected. Blood was collected in tubes containing 250 KIU/ml aprotinin (EMD Millipore), allowed to coagulate at room temperature for 30 min, centrifuged at  $1,500 \times g$  for 10 min, and the resulting serum transferred to a new tube. Samples were flash frozen in liquid nitrogen and kept at  $-80^\circ\text{C}$  until analyzed. Liver extracts were flash frozen in liquid nitrogen and kept at  $-80^\circ\text{C}$  until RNA was extracted.

### Electrophysiological Studies

To assess the effects of CNO on CCK<sup>LPBN</sup> neurons, 5- to 7-week-old CCK-ires-Cre mice were injected with either AAV8-DIO-hM3D<sub>q</sub>-mCherry or AAV8-DIO-hM4D<sub>q</sub>-mCherry into the LPBN 3 weeks before recording. Slices were maintained in aCSF containing 10 mM glucose. After acquisition of stable, whole-cell recordings for 2 to 5 min, aCSF solution containing CNO (5  $\mu$ M) was perfused into the brain slice preparation (for hM4Di-mCherry analysis, cells were injected with 5 pA of current). To assess the effect of CCK on VMH neurons (SF1+ or SF- neurons), 6- to 8-week-old SF1-Cre::R26-loxSTOPlox-L10-GFP mice were used. CCK-8S (100 nM; Tocris Biosciences) and C1988 (500 nM; Tocris Biosciences) were applied to bath solution containing either 5 mM or 0.5 mM glucose through perfusion. After acquisition of stable, whole-cell recording for 2–5 min, acSF solution containing 100 nM of CCK-8S was perfused for 3 to 5 min. Synaptic blockers (1 mM kynurenic acid and 100  $\mu$ M picrotoxin) were added in aCSF to synaptically isolate VMH neurons. The effect of glucose concentration on CCK<sup>LPBN</sup> neuron activity was assessed using a 5 mM → 0.5 mM → 5 mM step protocol, with osmolarity adjusted with sucrose.

### Statistics

Statistical analyses were performed using Prism 6 (Graphpad Software, Inc). Data were analyzed using t test, one-way ANOVA, or two-way ANOVA with post hoc comparisons, where appropriate. Data are presented as mean  $\pm$  SEM, and statistical significance was set at  $p < 0.05$ .

### SUPPLEMENTAL INFORMATION

Supplemental Information includes four figures and can be found with this article online at <http://dx.doi.org/10.1016/j.cmet.2014.11.006>.

### AUTHOR CONTRIBUTIONS

A.S.G. conceived experiments with input from L.K.H., M.G.M., M.L.E., B.B.L., C.M.P., and J.F. A.S.G. performed experiments with help from L.K.H., B.P.S., L.K.B., and J.C.M. Synaptophysin-mCherry construct was made by R.L.N. A.S.G. interpreted data with help from L.K.H., M.L.E., B.B.L., and M.G.M. A.S.G. wrote the manuscript with input from L.K.H., M.L.E., B.B.L., and M.G.M.

### ACKNOWLEDGMENTS

This work was supported by the University of Edinburgh Chancellor's Fellowship (A.S.G.), Wellcome Trust (L.K.H.; WT098012), and National Institutes of Health (B.B.L.; R01 DK096010, R01 DK089044, R01 DK071051, R01 DK075632, and R37 DK053477) (M.G.M.: R01 DK098853). Catecholamine assays were performed by the VUMC Hormone Assay Core (NIH grants DK059637 and DK020593).

Received: July 8, 2014

Revised: September 29, 2014

Accepted: November 7, 2014

Published: December 2, 2014

### REFERENCES

- Alexander, G.M., Rogan, S.C., Abbas, A.I., Armbruster, B.N., Pei, Y., Allen, J.A., Nonneman, R.J., Hartmann, J., Moy, S.S., Nicoletis, M.A., et al. (2009). Remote control of neuronal activity in transgenic mice expressing evolved G protein-coupled receptors. *Neuron* 63, 27–39.
- Borg, W.P., During, M.J., Sherwin, R.S., Borg, M.A., Brines, M.L., and Shulman, G.I. (1994). Ventromedial hypothalamic lesions in rats suppress counterregulatory responses to hypoglycemia. *J. Clin. Invest.* 93, 1677–1682.
- Borg, W.P., Sherwin, R.S., During, M.J., Borg, M.A., and Shulman, G.I. (1995). Local ventromedial hypothalamus glucopenia triggers counterregulatory hormone release. *Diabetes* 44, 180–184.

- Briski, K.P. (1999). Induction of Fos immunoreactivity by acute glucose deprivation in the rat caudal brainstem: relation to NADPH diaphorase localization. *Histochem. Cell Biol.* *111*, 229–233.
- Carter, M.E., Soden, M.E., Zweifel, L.S., and Palmiter, R.D. (2013). Genetic identification of a neural circuit that suppresses appetite. *Nature* *503*, 111–114.
- Choi, Y.H., Fujikawa, T., Lee, J., Reuter, A., and Kim, K.W. (2013). Revisiting the ventral medial nucleus of the hypothalamus: The roles of SF-1 neurons in energy homeostasis. *Front. Neurosci.* *7*, <http://dx.doi.org/10.3389/fnins.2013.00071>.
- Dhillon, H., Zigman, J.M., Ye, C., Lee, C.E., McGovern, R.A., Tang, V., Kenny, C.D., Christiansen, L.M., White, R.D., Edelstein, E.A., et al. (2006). Leptin directly activates SF1 neurons in the VMH, and this action by leptin is required for normal body-weight homeostasis. *Neuron* *49*, 191–203.
- Franklin, K.B.J., and Paxinos, G. (2008). *The Mouse Brain in Stereotaxic Coordinates*. (Amsterdam, London: Elsevier Academic Press).
- Fujiwara, T., Nagai, K., Takagi, S., and Nakagawa, H. (1988). Hyperglycemia induced by electrical stimulation of lateral part of dorsal parabrachial nucleus. *Am. J. Physiol.* *254*, E468–E475.
- Fulwiler, C.E., and Saper, C.B. (1984). Subnuclear organization of the efferent connections of the parabrachial nucleus in the rat. *Brain Res.* *319*, 229–259.
- Fulwiler, C.E., and Saper, C.B. (1985). Cholecystokinin-immunoreactive innervation of the ventromedial hypothalamus in the rat: possible substrate for autonomic regulation of feeding. *Neurosci. Lett.* *53*, 289–296.
- Garfield, A.S., Patterson, C., Skora, S., Gribble, F.M., Reimann, F., Evans, M.L., Myers, M.G., Jr., and Heisler, L.K. (2012). Neurochemical characterization of body weight-regulating leptin receptor neurons in the nucleus of the solitary tract. *Endocrinology* *153*, 4600–4607.
- Hermanson, O., Larhammar, D., and Blomqvist, A. (1998). Preprocholecystokinin mRNA-expressing neurons in the rat parabrachial nucleus: subnuclear localization, efferent projection, and expression of nociceptive-related intracellular signaling substances. *J. Comp. Neurol.* *400*, 255–270.
- Kim, K.W., Donato, J., Jr., Berglund, E.D., Choi, Y.H., Kohno, D., Elias, C.F., Depinho, R.A., and Elmquist, J.K. (2012). FOXO1 in the ventromedial hypothalamus regulates energy balance. *J. Clin. Invest.* *122*, 2578–2589.
- Klößener, T., Hess, S., Belgardt, B.F., Paeger, L., Verhagen, L.A., Husch, A., Sohn, J.W., Hampel, B., Dhillon, H., Zigman, J.M., et al. (2011). High-fat feeding promotes obesity via insulin receptor/PI3K-dependent inhibition of SF-1 VMH neurons. *Nat. Neurosci.* *14*, 911–918.
- Kow, L.M., and Pfaff, D.W. (1986). CCK-8 stimulation of ventromedial hypothalamic neurons in vitro: a feeding-relevant event? *Peptides* *7*, 473–479.
- Krashes, M.J., Koda, S., Ye, C., Rogan, S.C., Adams, A.C., Cusher, D.S., Maratos-Flier, E., Roth, B.L., and Lowell, B.B. (2011). Rapid, reversible activation of AgRP neurons drives feeding behavior in mice. *J. Clin. Invest.* *121*, 1424–1428.
- Krashes, M.J., Shah, B.P., Madara, J.C., Olson, D.P., Strohlic, D.E., Garfield, A.S., Vong, L., Pei, H., Watabe-Uchida, M., Uchida, N., et al. (2014). An excitatory paraventricular nucleus to AgRP neuron circuit that drives hunger. *Nature* *507*, 238–242.
- Little, T.J., Horowitz, M., and Feinle-Bisset, C. (2005). Role of cholecystokinin in appetite control and body weight regulation. *Obes. Rev.* *6*, 297–306.
- Marty, N., Dallaporta, M., and Thorens, B. (2007). Brain glucose sensing, counterregulation, and energy homeostasis. *Physiology (Bethesda)* *22*, 241–251.
- Nagai, K., Ino, H., Yamamoto, H., Nakagawa, H., Yamano, M., Tohyama, M., Shiosaka, S., Shiotani, Y., Inagaki, S., and Kitot, S. (1987). Lesions in the Lateral Part of the Dorsal Parabrachial Nucleus Caused Hyperphagia and Obesity. *J. Clin. Biochem. Nutr.* *3*, 102–112.
- Nakamura, K., and Morrison, S.F. (2008). A thermosensory pathway that controls body temperature. *Nat. Neurosci.* *11*, 62–71.
- Opland, D., Sutton, A., Woodworth, H., Brown, J., Bugescu, R., Garcia, A., Christensen, L., Rhodes, C., Myers, M., Jr., and Leininger, G. (2013). Loss of neurotensin receptor-1 disrupts the control of the mesolimbic dopamine system by leptin and promotes hedonic feeding and obesity. *Mol. Metab.* *2*, 423–434.
- Ritter, S., and Dinh, T.T. (1994). 2-Mercaptoacetate and 2-deoxy-D-glucose induce Fos-like immunoreactivity in rat brain. *Brain Res.* *641*, 111–120.
- Saper, C.B. (2002). The central autonomic nervous system: conscious visceral perception and autonomic pattern generation. *Annu. Rev. Neurosci.* *25*, 433–469.
- Taniguchi, H., He, M., Wu, P., Kim, S., Paik, R., Sugino, K., Kvitsiani, D., Fu, Y., Lu, J., Lin, Y., et al. (2011). A resource of Cre driver lines for genetic targeting of GABAergic neurons in cerebral cortex. *Neuron* *71*, 995–1013.
- Tong, Q., Ye, C., McCrimmon, R.J., Dhillon, H., Choi, B., Kramer, M.D., Yu, J., Yang, Z., Christiansen, L.M., Lee, C.E., et al. (2007). Synaptic glutamate release by ventromedial hypothalamic neurons is part of the neurocircuitry that prevents hypoglycemia. *Cell Metab.* *5*, 383–393.
- Wu, Q., Clark, M.S., and Palmiter, R.D. (2012). Deciphering a neuronal circuit that mediates appetite. *Nature* *483*, 594–597.



Cell Metabolism, Volume 20

## Supplemental Information

### A Parabrachial-Hypothalamic Cholecystokinin Neurocircuit

#### Controls Counterregulatory Responses to Hypoglycemia

Alastair S. Garfield, Bhavik P. Shah, Joseph C. Madara, Luke K. Burke,  
Christa M. Patterson, Jonathan Flak, Rachael L. Neve, Mark L. Evans,  
Bradford B. Lowell, Martin G. Myers Jr., and Lora K. Heisler

**1 SUPPLEMENTAL FIGURE LEGENDS**

2

**3 Figure S1, related to Figure 1.**

4 Comparative distribution profile of 2-deoxyglucose and insulin cFOS-IR (red) across the  
5 rostral-caudal extent of the LPBN (-5.02 to -5.52 mm from Bregma) compared to saline.  
6 Abbreviations: 2DG, 2-deoxyglucose; INS, insulin; SAL, saline; scp, superior cerebellar  
7 peduncle; S, superior LPBN; e, external LPBN; c, central LPBN; d, dorsal LPBN; v,  
8 ventral LPBN.

9

**10 Figure S2, related to Figure 2.**

11 (A-B) *CCK-ires-Cre::hM3D<sub>q</sub>-mCherry*<sup>LPBN</sup> neurons (red) exhibited robust cFOS-IR (green)  
12 in response to systemic CNO administration (1 mg/kg, i.p.) compared to saline controls.  
13 (C) The DREADD-receptor ligand, CNO, has no effect on blood glucose concentration in  
14 *CCK-ires-Cre* mice in the absence of Cre-dependent DREADD-receptor expression  
15 (n=6, Repeated measures ANOVA, main effect of treatments, time and interaction not  
16 significant). (D) Serum insulin levels were not significantly affected by CNO  
17 administration in *CCK-ires-Cre::hM3D<sub>q</sub>-mCherry*<sup>LPBN</sup> mice (n=5-8, t-test,  $t_{(11)}=1.4$ ,  $p=0.2$ ),  
18 compared to saline controls (E) *CCK-ires-Cre::hM3D<sub>q</sub>-mCherry*<sup>LPBN</sup> mice do not exhibit a  
19 difference in 3 hour food intake following an overnight fast (n=10, t-test,  $t_{(9)}=1.4$ ,  $p=0.2$ ).  
20 All data are presented as mean±SEM.

21

**22 Figure S3, related to Figure 3.**

23 (A-C) *CCK-ires-Cre::hM4D<sub>I</sub>-mCherry*<sup>LPBN</sup> mice do not exhibit altered feeding behavior in  
24 response to CNO administration compared to saline administration. (A) 3 hour dark-cycle  
25 food intake in *ad libitum* fed mice (n=7, paired t-test,  $t_{(6)}=0.4$ ,  $p=0.7$ ). (B) 3 hour light cycle  
26 food intake in *ad libitum* fed mice (n=11; paired t-test,  $t_{(11)}=0.4$ ,  $p=0.7$ ). (C) 3 hour food  
27 intake in mice following an overnight fast (n=7; paired t-test,  $t_{(6)}=0.08$ ,  $p=0.9$ ). All data are  
28 presented as mean±SEM.

29

**30 Figure S4, related to Figure 4.**

31 (A-F) Unilateral stereotaxic injection of Cre-dependent AAV-synpatophysin-mCherry  
32 virus into the LPBN of *CCK-ires-Cre* mice facilitated genetically-defined tract tracing of  
33 CCK<sup>LPBN</sup> neuron projections. Only ascending projections were observed, principally  
34 terminating within the ipsilateral hypothalamus. (G) CCK-8S application to SF1<sup>VMH</sup>

1 neurons incubated in normal glucose conditions (5 mM) resulted in an increase in firing  
2 frequency (5/9) (paired t-test,  $t_{(4)}=3.24$ ,  $p<0.05$ ). (J-K) Non-SF1<sup>VMH</sup> neurons are  
3 unresponsive to CCK in *ex vivo* slice preparations. (H) Non-SF1<sup>VMH</sup> neurons (10/10) did  
4 not exhibit a change in firing frequency over baseline upon CCK administration (paired t-  
5 test,  $t_{(9)}=0.1$ ,  $p=0.9$ ). (I) Representative electrophysiological trace of a CCK insensitive  
6 non-SF1<sup>VMH</sup> neuron. (J) Cre-dependent AAV-synaptophysin-mCherry virus injections into  
7 the LPBN of *vGLUT2-ires-Cre* mice revealed no VMH projection. (K) Chemogenetic  
8 activation of *vGLUT2-ires-Cre::hM3Dq<sup>LPBN</sup>* neurons failed to elevate blood glucose levels  
9 ( $n=4$ , Repeated measures ANOVA, main effect of treatments, time and interaction not  
10 significant). (L) Chemogenetic inhibition of *SF1-Cre::hM4Di<sup>VMH</sup>* neurons resulted in a  
11 significant attenuation of the hyperglycemic response to 2DG ( $n=4$ ; Repeated measures  
12 ANOVA, main effect of treatment ( $F_{(1,21)}=43.6$ ,  $p<0.0004$ ), main effect of time  
13 ( $F_{(6,21)}=10.7$ ,  $p<0.0001$ ) and interaction ( $F_{(6,21)}=3.5$ ,  $p=0.01$ ), *post-hoc* comparisons  
14 determined by Sidak's post-hoc test for individual time point analysis). (M-O) CCK<sup>DMH</sup>  
15 neurons are not engaged by CCK<sup>LPBN</sup> neurons. (M) CNO mediated activation of *CCK-*  
16 *ires-Cre::hM3Dq-mCherry<sup>LPBN</sup>* neurons does not evoke cFOS-IR (magenta) within  
17 CCK<sup>DMH</sup> neurons (green) in *CCK-ires-Cre::R26-loxSTOPlox-L10-GFP* mice. (N)  
18 CCK<sup>DMH</sup> neurons are not responsive to exogenous CCK-8S (0/4 cells). (O)  
19 chemogenetic silencing of CCK<sup>DMH</sup> neurons does not influence blood glucose levels  
20 ( $n=4$ , Repeated measures ANOVA, main effect of treatments, time and interaction not  
21 significant). Abbreviations: ARC, arcuate nucleus of the hypothalamus; AHC, anterior  
22 hypothalamic area, central part; BST, bed nucleus of the stria terminalis; DMH,  
23 dorsomedial nucleus of the hypothalamus; cDMH, DMH, compact part; LHA, lateral  
24 hypothalamic area; LPBN, lateral parabrachial nucleus; MnPO, median preoptic nucleus;  
25 MPA, median preoptic area; MeP, medial amygdaloid nucleus; PAG, periaqueductal  
26 gray; PVT, paraventricular nucleus of the thalamus; PVH, paraventricular nucleus of the  
27 hypothalamus; PP, peripeduncular nucleus; SCh, suprachiasmatic nucleus; SnC,  
28 substantia nigra pars compacta; VMH, ventromedial nucleus of the hypothalamus. All  
29 data are presented as mean±SEM; \* $p<0.05$ , \*\* $p<0.01$ , \*\*\* $p<0.001$ .

30  
31  
32  
33  
34

## 1 SUPPLEMENTAL EXPERIMENTAL PROCEDURES

2

### 3 **Animals**

4 Mice were housed at 22°C–24°C with a 12-hour light/12-hour dark cycle and standard  
5 mouse chow (Teklad F6 Rodent Diet 8664) and water provided *ad libitum*. Animal care  
6 and experimental procedures were performed with approval by the Beth Israel  
7 Deaconess Medical Center Institutional Animal Care and Use Committee or were  
8 performed in accordance with the UK Animals (Scientific Procedures) Act 1986.

9

### 10 **Drugs**

11 Drugs for *in vivo* use were prepared in sterile saline and administered intraperitoneally  
12 (i.p.). Clozapine-*N*-oxide (CNO; a generous gift from Dr Bryan Roth, University of North  
13 Carolina) was administered at 1 mg/kg, humalin R (Eli Lilly) was administered at 1 U/kg,  
14 2-Deoxyglucose (2DG, Sigma Aldrich) was administered at 500 mg/kg, proglumide  
15 (Tocris Bioscience) was administered at 20 mg/kg. CI988 (Tocris Bioscience) was  
16 dissolved in 50% DMSO and administered at 1 mg/kg.

17

### 18 **Stereotaxic surgery**

19 Nucleus specific delivery of AAVs was achieved through stereotaxic injection, as  
20 previously described (Krashes et al., 2011). In brief, 5-8 week old male mice were  
21 anesthetized with 100 mg/kg ketamine and 10 mg/kg xylazine (i.p). Mice were placed in  
22 a stereotaxic frame (Kopf Instruments) and the skull exposed by a single longitudinal  
23 incision. A hole was drilled in the skull at the injection site and a virus filled pulled-glass  
24 micropipette (diameter 20-40  $\mu$ m) inserted into the brain. Virus was delivered under air  
25 pressure using a micromanipulator (Grass Technologies). For LPBN injections 25 nl and  
26 for VMH 50 nl of virus was delivered. The pipette remained in place for a minimum of 5  
27 minutes after injection. Based on the Mouse Brain Atlas (Franklin and Paxinos, 2008) the  
28 following coordinates used for targeting (mm from Bregma): LPBN, A/P, -5.02; M/V,  $\pm$ 1.3;  
29 D/V, -3.4 mm. VMH, A/P, -1.57; M/V,  $\pm$  0.3; D/V, -5.60 mm. Animals were administered  
30 an analgesic (5 mg/kg Meloxicam, Norbrook) for 3 days post-operatively and given a  
31 minimum of 14 days recovery before being used in any experiments, during this time  
32 they were also acclimated to i.p injection by once daily injections of 0.3 ml sterile saline.  
33 Mice injected with AAV8-hSyn-DIO-Synaptophysin-mCherry were tested at least 3  
34 weeks after treatment to ensure labelling of distal projection sites.

## 1 **Brain tissue preparation**

2 Mice were terminally anesthetized with chloral hydrate (Sigma Aldrich) and transcardially  
3 perfused with phosphate-buffered saline (PBS) followed by 10% neutral buffered  
4 formalin (Fisher Scientific). Brains were extracted, cryoprotected in 20% sucrose, and  
5 sectioned coronally on a freezing sliding microtome (Leica Biosystems) at 30 µm and  
6 collected in four equal series.

7

## 8 **Immunohistochemistry**

9 Briefly, sections were washed in PBS before blocking in 0.5% BSA/0.25% Triton X-100  
10 in PBS for 1 hour at room temperature. Tissue was incubated overnight at room  
11 temperature in blocking buffer containing the primary antibodies (diluted 1/1000): rabbit  
12 anti-cFOS (EMD Millipore), rabbit anti-RFP (Clontech Laboratories, Inc.) or chicken anti-  
13 GFP (EMD Millipore). The next day sections were washed in PBS then incubated in  
14 blocking buffer containing appropriate secondary antibody (1/1000, Alexa Fluor; Life  
15 Technologies) for 1 hour. Sections were mounted onto microscope slides and  
16 coverslipped in an aqueous mounting medium containing DAPI (Vectastain; Vector  
17 Laboratories). Slides were imaged on a VS120 slide scanner (Olympus). For counting of  
18 cFOS-IR nuclei, the boundaries of the nucleus were defined using neuroanatomical  
19 landmarks and the Mouse Brain Atlas (Franklin and Paxinos, 2008). All sections within  
20 one series containing the nucleus of interest were counted bilaterally and an average  
21 determined from each section. For CCK co-localisation the total number of CCK<sup>LPBN</sup>  
22 neurons and number of cFOS-IR+CCK<sup>LPBN</sup> neurons in one series were counted.

23

## 24 **Blood chemistry analysis**

25 Insulin and glucagon levels were determined from serum samples recovered 60 minutes  
26 after SAL or CNO administration by means of a multiplex ELISA (EMD Millipore).  
27 Catecholamine levels were determined from plasma samples recovered 60 minutes after  
28 SAL or CNO administration by HPLC via electrochemical detection. Specifically, trunk  
29 blood was collected in tubes containing 236 mM EGTA (Sigma Aldrich) and 195 mM  
30 glutathione (Sigma Aldrich) following decapitated. Samples were centrifuged for 15  
31 minutes at 1,500g at 4°C and the resulting plasma transferred to a new tube. Plasma  
32 was absorbed onto alumina at a pH 8.6, eluted with dilute perchloric acid and auto-  
33 injected onto a C18 reversed-phase column. An internal standard  
34 (dehydroxybenzylamine; DHBA) was included with each extraction to monitor recovery

1 and standard curves for both epinephrine and norepinephrine were run. Results are  
2 quantitated through a chromatography data station.

3

#### 4 **RNA extraction and quantitative-PCR**

5 Total RNA was extracted from 100 mg of liver using PureLink RNA mini kit (Life  
6 Technologies), as per the manufacture's instructions. Multiplex qPCR analysis of  
7 glucose-6-phosphatase (*G6pc*) and 18S ribosomal RNA (18S) expression was  
8 conducted using pre-designed Taqman assays and Taqman One-Step RT-PCR Master  
9 Mix (Applied Biosystems), as per the manufacture's instructions. qPCR was run on a  
10 Applied Biosystems Prism 7000 Sequence Detection System. Reactions were  
11 multiplexed for G6pc/18S. Data were analyzed using the 2- $\Delta\Delta$ CT method.

12

#### 13 **Feeding studies**

14 *Dark-cycle food intake.* Mice were injected with saline or 1 mg/kg CNO 30 minutes prior  
15 to the onset of the dark cycle and food removed. Food was returned at lights-off and  
16 weighed every hour over the next three hours. *Post-fast reefered.* Mice were fasted  
17 overnight. The following morning, mice were injected with saline or 1 mg/kg CNO and  
18 food returned 30 minutes later and weighed every hour for the next three hours. *Light-*  
19 *cycle food intake.* Mice were injected with saline or 1 mg/kg CNO at 9am and food intake  
20 monitored over the next three hours.

21

#### 22 **Electrophysiology**

23 For brain slice preparation, 5-12 week old mice were terminally anesthetized with 7%  
24 chloral hydrate (i.p) and transcardially perfused with ice-cold artificial cerebral spinal fluid  
25 (aCSF). The mice were decapitated and brains were removed. Brains were immediately  
26 submerged in ice-cold, carbogen-saturated (95% O<sub>2</sub>, 5% CO<sub>2</sub>) high sucrose solution  
27 (238 mM sucrose, 26 mM NaHCO<sub>3</sub>, 2.5 mM KCl, 1.0 mM NaH<sub>2</sub>PO<sub>4</sub>, 5.0 mM MgCl<sub>2</sub>, 10.0  
28 mM CaCl<sub>2</sub>, 10 mM glucose). 300  $\mu$ M thick coronal sections were cut with a Leica  
29 VT1000S vibratome and incubated in oxygenated aCSF (126 mM NaCl, 21.4 mM  
30 NaHCO<sub>3</sub>, 2.5 mM KCl, 1.2 mM NaH<sub>2</sub>PO<sub>4</sub>, 1.2 mM MgCl<sub>2</sub>, 2.4 mM CaCl<sub>2</sub>, 10 mM glucose)  
31 at 34°C for 30 minutes. Slices were maintained and recorded at room temperature (20–  
32 24°C). The intracellular solution for current clamp recordings contained: 128 mM K  
33 gluconate, 10 mM KCl, 10 mM HEPES, 1 mM EGTA, 1 mM MgCl<sub>2</sub>, 0.3 mM CaCl<sub>2</sub>, 5 mM  
34 Na<sub>2</sub>ATP and 0.3 mM NaGTP, adjusted to pH 7.3 with KOH. All recordings were made

1 using multiclamp 700B amplifier, and the data was filtered at 2 kHz and digitized at 10  
2 kHz. For low glucose conditions, cells were incubated in oxygenated aCSF containing  
3 0.5 mM glucose, with osmolarity adjusted with sucrose. In all studies responding cells  
4 were defined by a stimulus induced change in firing rate or membrane potential that was  
5 2xSD±mean.

Supplemental Figure 1

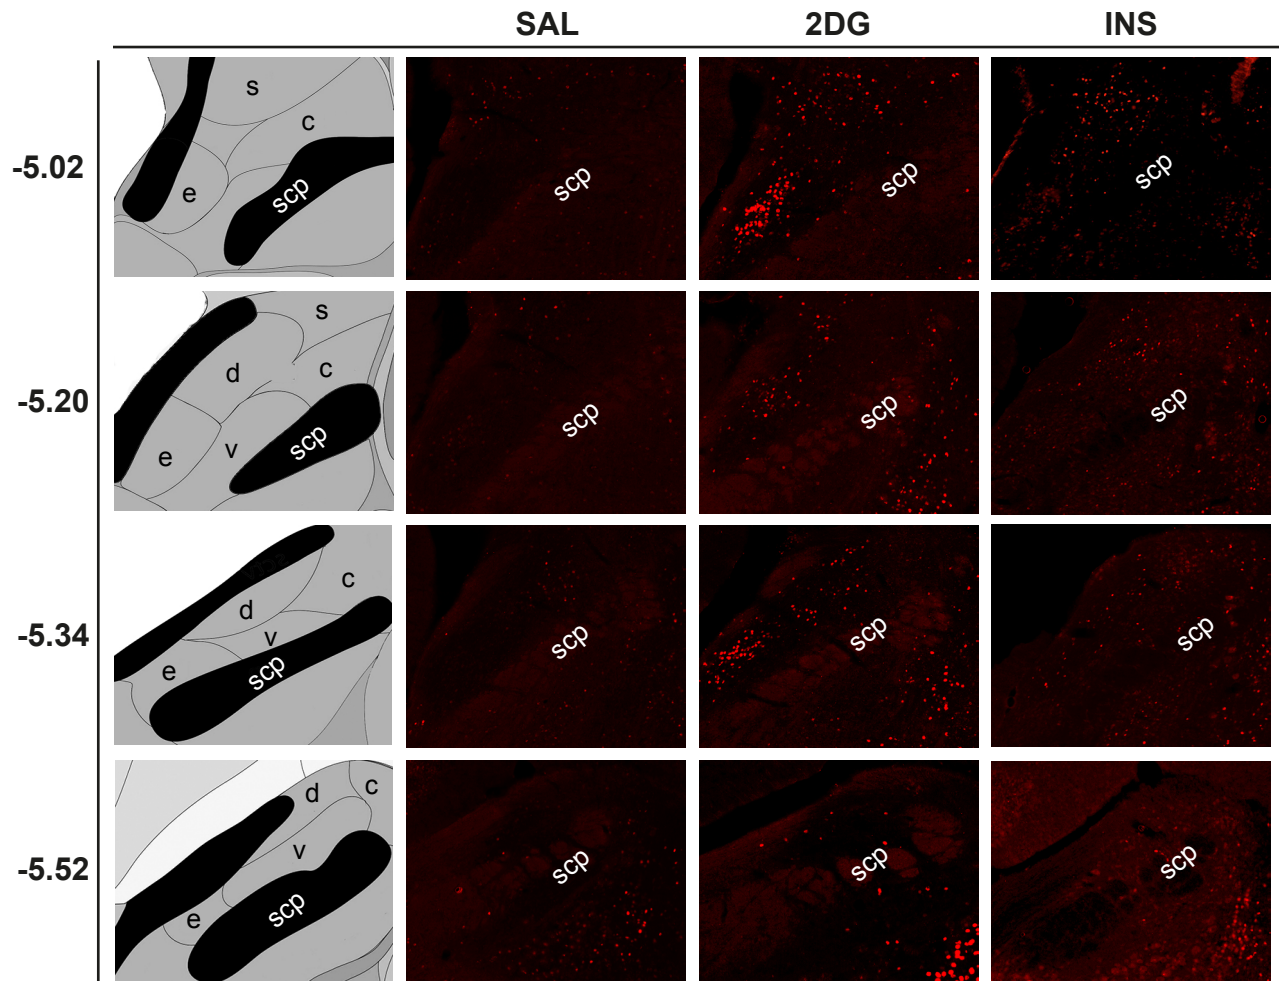



## Supplemental Figure 2

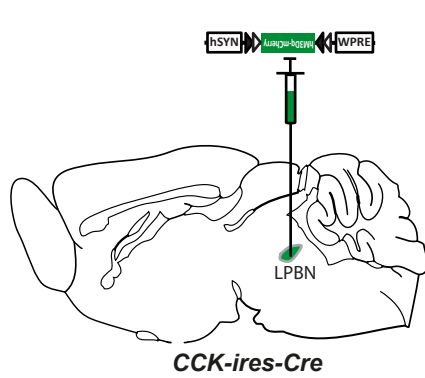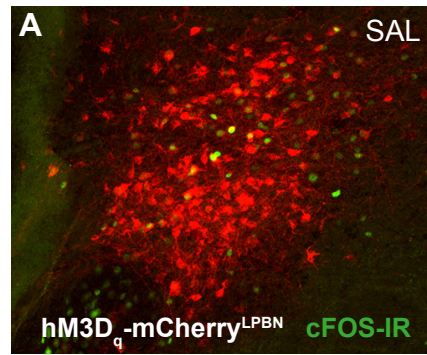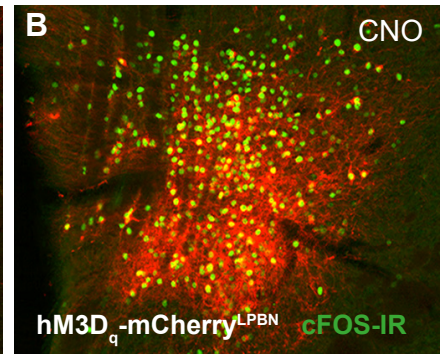

**C**

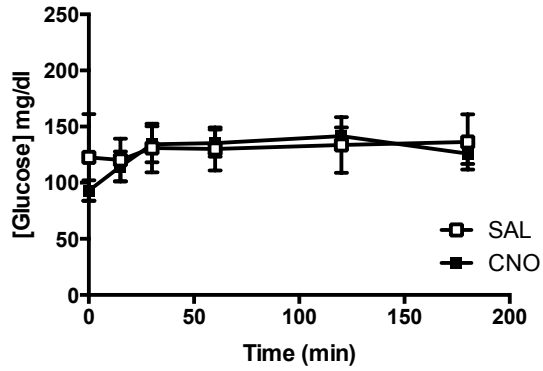

**D**

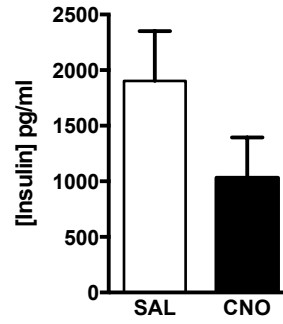

**E**

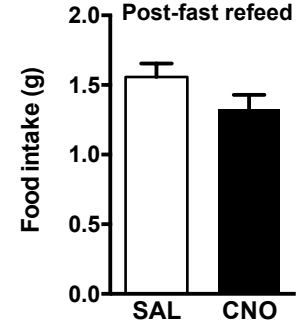

### Supplemental Figure 3

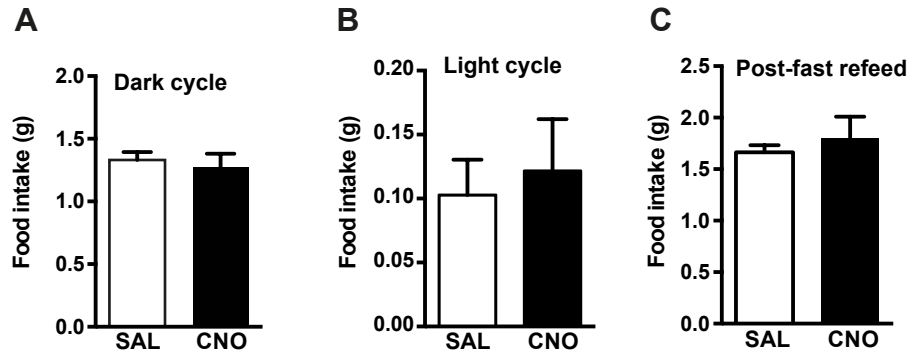

Supplemental Figure 4

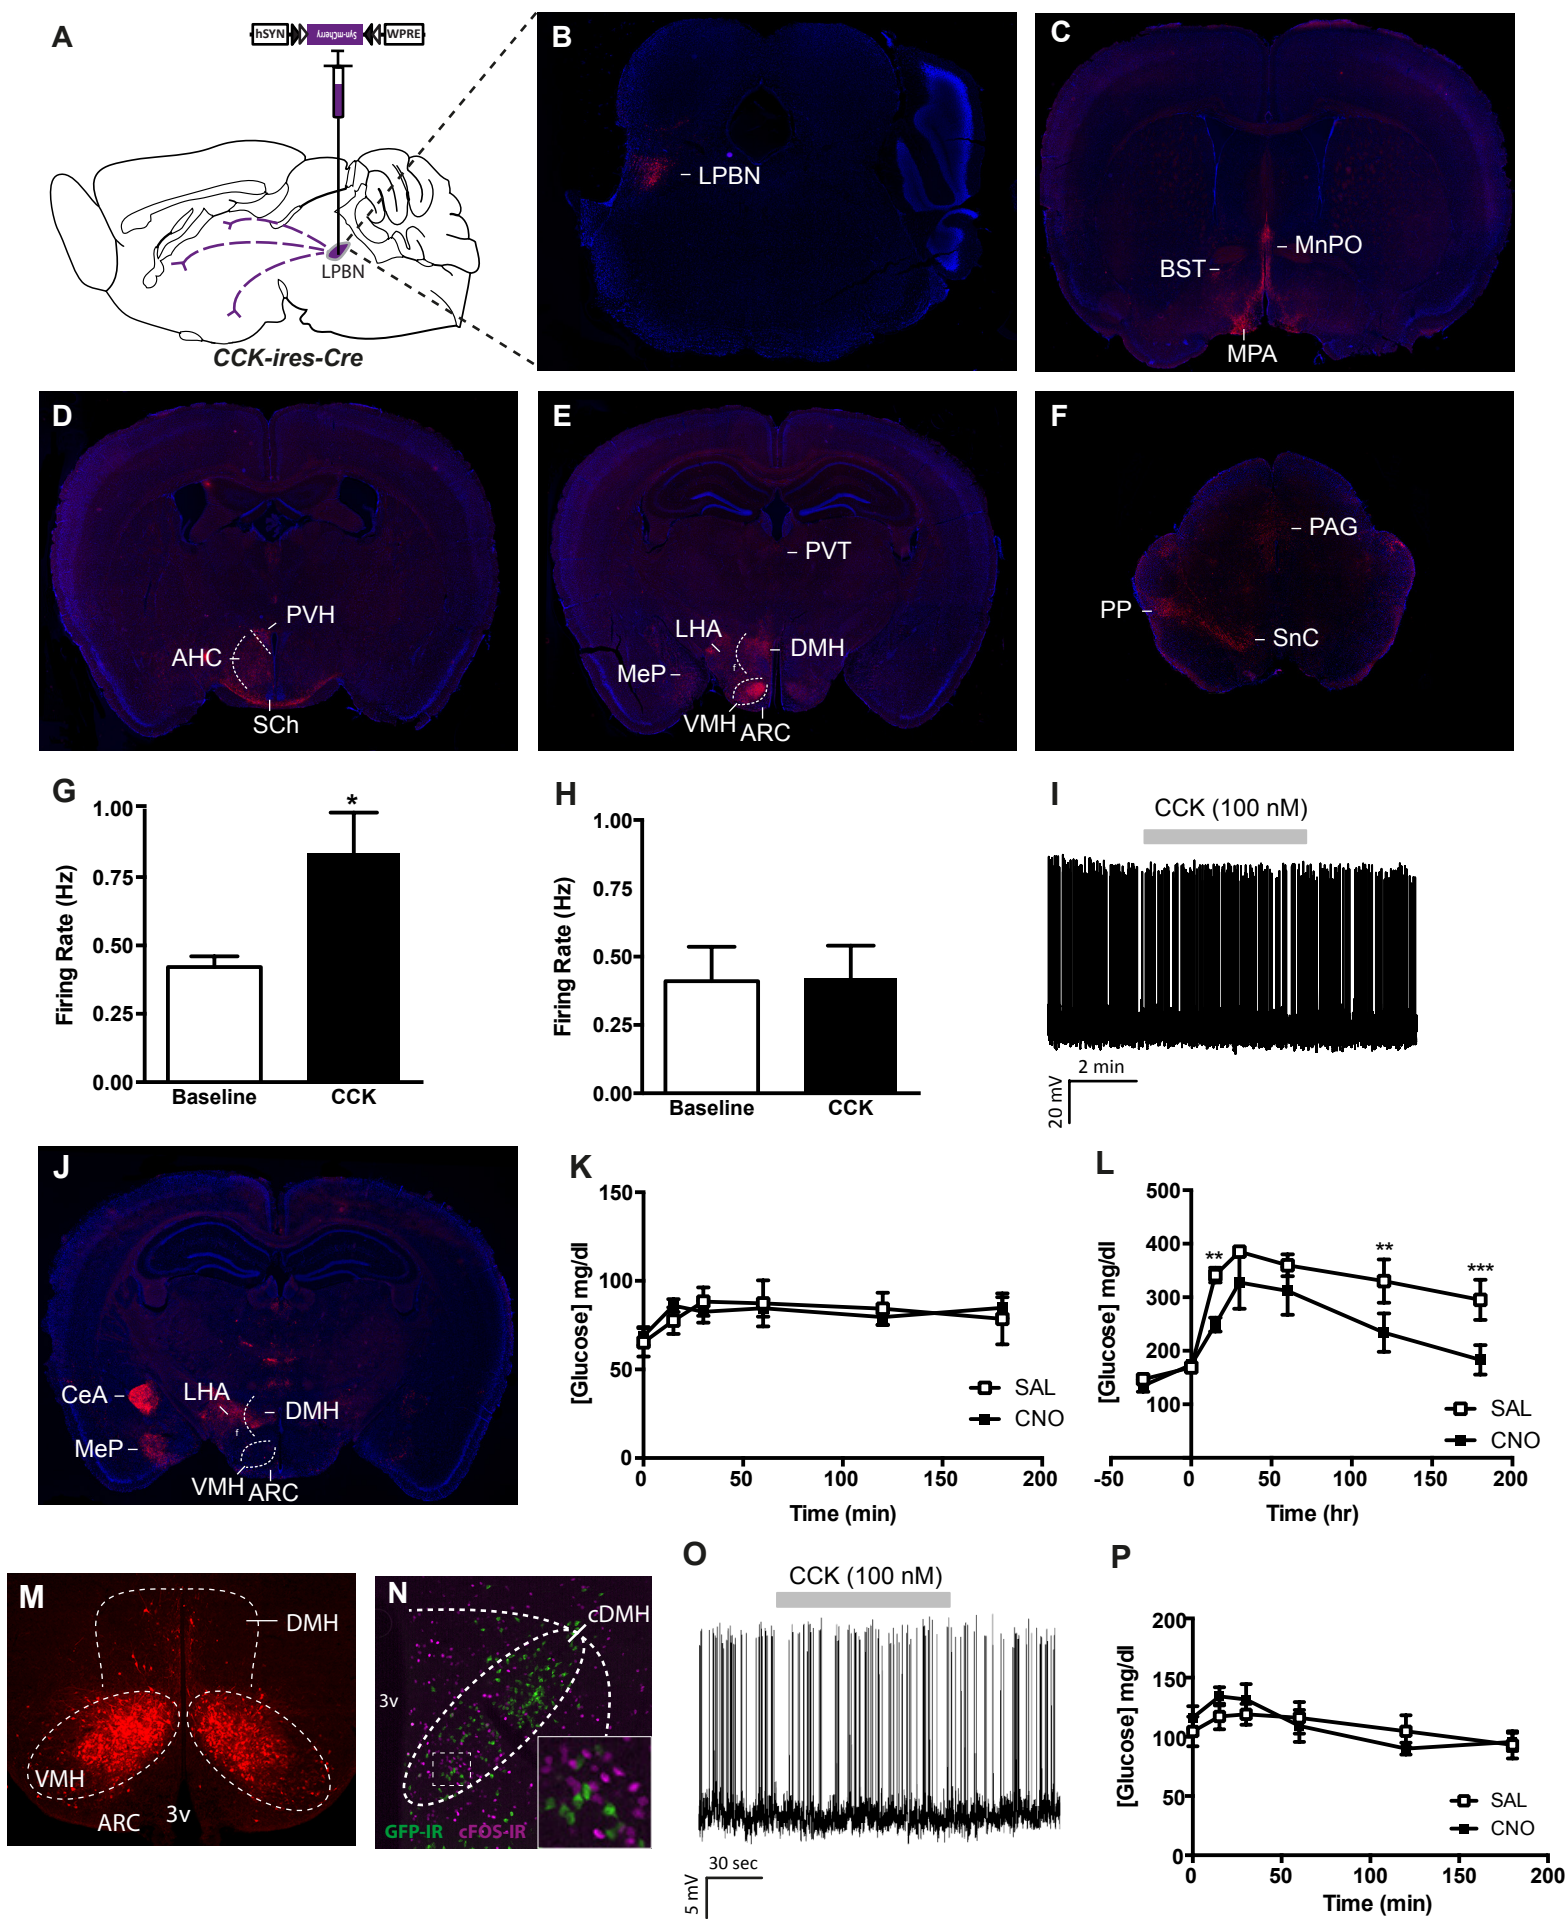

Supplement: mmc2.pdf [file mmc2.pdf]
